# Supplementary material for: Predicting plant biomass accumulation from image-derived parameters
Source: PubMed Central journal article supplement (PMC5827348; doi:10.1093/gigascience/giy001), 2018-01-16

|                                                      |                                                                                                                                                                                                                                                                                                                                                                                                                                                                                                                                                                                                                                                                                                                                                                                                                                                                                                                                                                                                                                                                                                                                                                                                                                                                                                                                                                                                                                                                                                                                                                                                                                                                                                                                                                                                                                                                                              |                      |
|------------------------------------------------------|----------------------------------------------------------------------------------------------------------------------------------------------------------------------------------------------------------------------------------------------------------------------------------------------------------------------------------------------------------------------------------------------------------------------------------------------------------------------------------------------------------------------------------------------------------------------------------------------------------------------------------------------------------------------------------------------------------------------------------------------------------------------------------------------------------------------------------------------------------------------------------------------------------------------------------------------------------------------------------------------------------------------------------------------------------------------------------------------------------------------------------------------------------------------------------------------------------------------------------------------------------------------------------------------------------------------------------------------------------------------------------------------------------------------------------------------------------------------------------------------------------------------------------------------------------------------------------------------------------------------------------------------------------------------------------------------------------------------------------------------------------------------------------------------------------------------------------------------------------------------------------------------|----------------------|
| <b>Manuscript Number:</b>                            | GIGA-D-17-00225R1                                                                                                                                                                                                                                                                                                                                                                                                                                                                                                                                                                                                                                                                                                                                                                                                                                                                                                                                                                                                                                                                                                                                                                                                                                                                                                                                                                                                                                                                                                                                                                                                                                                                                                                                                                                                                                                                            |                      |
| <b>Full Title:</b>                                   | Predicting plant biomass accumulation from image-derived parameters                                                                                                                                                                                                                                                                                                                                                                                                                                                                                                                                                                                                                                                                                                                                                                                                                                                                                                                                                                                                                                                                                                                                                                                                                                                                                                                                                                                                                                                                                                                                                                                                                                                                                                                                                                                                                          |                      |
| <b>Article Type:</b>                                 | Research                                                                                                                                                                                                                                                                                                                                                                                                                                                                                                                                                                                                                                                                                                                                                                                                                                                                                                                                                                                                                                                                                                                                                                                                                                                                                                                                                                                                                                                                                                                                                                                                                                                                                                                                                                                                                                                                                     |                      |
| <b>Funding Information:</b>                          | Robert Bosch Stiftung<br>(32.5.8003.0116.0)                                                                                                                                                                                                                                                                                                                                                                                                                                                                                                                                                                                                                                                                                                                                                                                                                                                                                                                                                                                                                                                                                                                                                                                                                                                                                                                                                                                                                                                                                                                                                                                                                                                                                                                                                                                                                                                  | Dr. Christian Klukas |
|                                                      | Federal Agency for Agriculture and Food<br>(15/12-13, 530-06.01-BiKo CHN)                                                                                                                                                                                                                                                                                                                                                                                                                                                                                                                                                                                                                                                                                                                                                                                                                                                                                                                                                                                                                                                                                                                                                                                                                                                                                                                                                                                                                                                                                                                                                                                                                                                                                                                                                                                                                    | Dr. Christian Klukas |
|                                                      | Bundesministerium für Bildung und<br>Forschung<br>(0315958A and 031A053B)                                                                                                                                                                                                                                                                                                                                                                                                                                                                                                                                                                                                                                                                                                                                                                                                                                                                                                                                                                                                                                                                                                                                                                                                                                                                                                                                                                                                                                                                                                                                                                                                                                                                                                                                                                                                                    | Dr. Christian Klukas |
|                                                      | European Plant Phenotyping Network<br>(284443)                                                                                                                                                                                                                                                                                                                                                                                                                                                                                                                                                                                                                                                                                                                                                                                                                                                                                                                                                                                                                                                                                                                                                                                                                                                                                                                                                                                                                                                                                                                                                                                                                                                                                                                                                                                                                                               | Dr. Christian Klukas |
| <b>Abstract:</b>                                     | <p><b>Background:</b><br/>Image-based high-throughput phenotyping technologies have been rapidly developed in plant science recently and they provide a great potential to gain more valuable information than traditionally destructive methods. Predicting plant biomass is regarded as a key purpose for plant breeders and ecologist. However, it is a great challenge to find a predictive biomass model across experiments.</p> <p><b>Results:</b><br/>In the present study, we constructed four predictive models to examine the quantitative relationship between image-based features and plant biomass accumulation. Our methodology has been applied to three consecutive barley (<i>Hordeum vulgare</i>) experiments with control and stress treatments. The results proved that plant biomass can be accurately predicted from image-based parameters using a random forest model. The high prediction accuracy based on this model, in particular the cross-experiment performance, will contribute to relieve the phenotyping bottleneck in biomass measurement in breeding applications. The relative contribution of individual features for predicting biomass was further quantified, revealing new insights into the phenotypic determinants of plant biomass outcome. Furthermore, the methods could also be used to determine the most important image-based features related to plant biomass accumulation, which would be promising for subsequent genetic mapping to uncover the genetic basis of biomass.</p> <p><b>Conclusions:</b><br/>We have developed quantitative models to accurately predict plant biomass accumulation from image data. We anticipate that the analysis results will be useful to advance our views of the phenotypic determinants of plant biomass outcome, and the statistical methods can be broadly used for other plant species.</p> |                      |
| <b>Corresponding Author:</b>                         | Dijun Chen<br><br>GERMANY                                                                                                                                                                                                                                                                                                                                                                                                                                                                                                                                                                                                                                                                                                                                                                                                                                                                                                                                                                                                                                                                                                                                                                                                                                                                                                                                                                                                                                                                                                                                                                                                                                                                                                                                                                                                                                                                    |                      |
| <b>Corresponding Author Secondary Information:</b>   |                                                                                                                                                                                                                                                                                                                                                                                                                                                                                                                                                                                                                                                                                                                                                                                                                                                                                                                                                                                                                                                                                                                                                                                                                                                                                                                                                                                                                                                                                                                                                                                                                                                                                                                                                                                                                                                                                              |                      |
| <b>Corresponding Author's Institution:</b>           |                                                                                                                                                                                                                                                                                                                                                                                                                                                                                                                                                                                                                                                                                                                                                                                                                                                                                                                                                                                                                                                                                                                                                                                                                                                                                                                                                                                                                                                                                                                                                                                                                                                                                                                                                                                                                                                                                              |                      |
| <b>Corresponding Author's Secondary Institution:</b> |                                                                                                                                                                                                                                                                                                                                                                                                                                                                                                                                                                                                                                                                                                                                                                                                                                                                                                                                                                                                                                                                                                                                                                                                                                                                                                                                                                                                                                                                                                                                                                                                                                                                                                                                                                                                                                                                                              |                      |
| <b>First Author:</b>                                 | Dijun Chen                                                                                                                                                                                                                                                                                                                                                                                                                                                                                                                                                                                                                                                                                                                                                                                                                                                                                                                                                                                                                                                                                                                                                                                                                                                                                                                                                                                                                                                                                                                                                                                                                                                                                                                                                                                                                                                                                   |                      |
| <b>First Author Secondary Information:</b>           |                                                                                                                                                                                                                                                                                                                                                                                                                                                                                                                                                                                                                                                                                                                                                                                                                                                                                                                                                                                                                                                                                                                                                                                                                                                                                                                                                                                                                                                                                                                                                                                                                                                                                                                                                                                                                                                                                              |                      |
| <b>Order of Authors:</b>                             | Dijun Chen                                                                                                                                                                                                                                                                                                                                                                                                                                                                                                                                                                                                                                                                                                                                                                                                                                                                                                                                                                                                                                                                                                                                                                                                                                                                                                                                                                                                                                                                                                                                                                                                                                                                                                                                                                                                                                                                                   |                      |
|                                                      | Rongli Shi                                                                                                                                                                                                                                                                                                                                                                                                                                                                                                                                                                                                                                                                                                                                                                                                                                                                                                                                                                                                                                                                                                                                                                                                                                                                                                                                                                                                                                                                                                                                                                                                                                                                                                                                                                                                                                                                                   |                      |
|                                                      | Jean-Michel Pape                                                                                                                                                                                                                                                                                                                                                                                                                                                                                                                                                                                                                                                                                                                                                                                                                                                                                                                                                                                                                                                                                                                                                                                                                                                                                                                                                                                                                                                                                                                                                                                                                                                                                                                                                                                                                                                                             |                      |
|                                                      |                                                                                                                                                                                                                                                                                                                                                                                                                                                                                                                                                                                                                                                                                                                                                                                                                                                                                                                                                                                                                                                                                                                                                                                                                                                                                                                                                                                                                                                                                                                                                                                                                                                                                                                                                                                                                                                                                              |                      |

|                                                |                                                                                                                                                                                                                                                                                                                                                                                                                                                                                                                                                                                                                                                                                                                                                                                                                                                                                                                                                                                                                                                                                                                                                                                                                                                                                                                                                                                                                                                                                                                                                                                                                                                                                                                                                                                                                                                                                                                                                                                                                                                                                                                                                                                                                                                                                                                                                                                                                                                                                                                                                                                                                                                                                                                                                                                                                                                                                                                                                                                                                                                                                                                                                                                                                                                                                                                                                                                                                                                                                                                                                                                                                                                                                                                                                                                                                                                 |
|------------------------------------------------|-------------------------------------------------------------------------------------------------------------------------------------------------------------------------------------------------------------------------------------------------------------------------------------------------------------------------------------------------------------------------------------------------------------------------------------------------------------------------------------------------------------------------------------------------------------------------------------------------------------------------------------------------------------------------------------------------------------------------------------------------------------------------------------------------------------------------------------------------------------------------------------------------------------------------------------------------------------------------------------------------------------------------------------------------------------------------------------------------------------------------------------------------------------------------------------------------------------------------------------------------------------------------------------------------------------------------------------------------------------------------------------------------------------------------------------------------------------------------------------------------------------------------------------------------------------------------------------------------------------------------------------------------------------------------------------------------------------------------------------------------------------------------------------------------------------------------------------------------------------------------------------------------------------------------------------------------------------------------------------------------------------------------------------------------------------------------------------------------------------------------------------------------------------------------------------------------------------------------------------------------------------------------------------------------------------------------------------------------------------------------------------------------------------------------------------------------------------------------------------------------------------------------------------------------------------------------------------------------------------------------------------------------------------------------------------------------------------------------------------------------------------------------------------------------------------------------------------------------------------------------------------------------------------------------------------------------------------------------------------------------------------------------------------------------------------------------------------------------------------------------------------------------------------------------------------------------------------------------------------------------------------------------------------------------------------------------------------------------------------------------------------------------------------------------------------------------------------------------------------------------------------------------------------------------------------------------------------------------------------------------------------------------------------------------------------------------------------------------------------------------------------------------------------------------------------------------------------------------|
|                                                | Kerstin Neumann                                                                                                                                                                                                                                                                                                                                                                                                                                                                                                                                                                                                                                                                                                                                                                                                                                                                                                                                                                                                                                                                                                                                                                                                                                                                                                                                                                                                                                                                                                                                                                                                                                                                                                                                                                                                                                                                                                                                                                                                                                                                                                                                                                                                                                                                                                                                                                                                                                                                                                                                                                                                                                                                                                                                                                                                                                                                                                                                                                                                                                                                                                                                                                                                                                                                                                                                                                                                                                                                                                                                                                                                                                                                                                                                                                                                                                 |
|                                                | Daniel Arend                                                                                                                                                                                                                                                                                                                                                                                                                                                                                                                                                                                                                                                                                                                                                                                                                                                                                                                                                                                                                                                                                                                                                                                                                                                                                                                                                                                                                                                                                                                                                                                                                                                                                                                                                                                                                                                                                                                                                                                                                                                                                                                                                                                                                                                                                                                                                                                                                                                                                                                                                                                                                                                                                                                                                                                                                                                                                                                                                                                                                                                                                                                                                                                                                                                                                                                                                                                                                                                                                                                                                                                                                                                                                                                                                                                                                                    |
|                                                | Andreas Graner                                                                                                                                                                                                                                                                                                                                                                                                                                                                                                                                                                                                                                                                                                                                                                                                                                                                                                                                                                                                                                                                                                                                                                                                                                                                                                                                                                                                                                                                                                                                                                                                                                                                                                                                                                                                                                                                                                                                                                                                                                                                                                                                                                                                                                                                                                                                                                                                                                                                                                                                                                                                                                                                                                                                                                                                                                                                                                                                                                                                                                                                                                                                                                                                                                                                                                                                                                                                                                                                                                                                                                                                                                                                                                                                                                                                                                  |
|                                                | Ming Chen                                                                                                                                                                                                                                                                                                                                                                                                                                                                                                                                                                                                                                                                                                                                                                                                                                                                                                                                                                                                                                                                                                                                                                                                                                                                                                                                                                                                                                                                                                                                                                                                                                                                                                                                                                                                                                                                                                                                                                                                                                                                                                                                                                                                                                                                                                                                                                                                                                                                                                                                                                                                                                                                                                                                                                                                                                                                                                                                                                                                                                                                                                                                                                                                                                                                                                                                                                                                                                                                                                                                                                                                                                                                                                                                                                                                                                       |
|                                                | Christian Klukas                                                                                                                                                                                                                                                                                                                                                                                                                                                                                                                                                                                                                                                                                                                                                                                                                                                                                                                                                                                                                                                                                                                                                                                                                                                                                                                                                                                                                                                                                                                                                                                                                                                                                                                                                                                                                                                                                                                                                                                                                                                                                                                                                                                                                                                                                                                                                                                                                                                                                                                                                                                                                                                                                                                                                                                                                                                                                                                                                                                                                                                                                                                                                                                                                                                                                                                                                                                                                                                                                                                                                                                                                                                                                                                                                                                                                                |
| <b>Order of Authors Secondary Information:</b> |                                                                                                                                                                                                                                                                                                                                                                                                                                                                                                                                                                                                                                                                                                                                                                                                                                                                                                                                                                                                                                                                                                                                                                                                                                                                                                                                                                                                                                                                                                                                                                                                                                                                                                                                                                                                                                                                                                                                                                                                                                                                                                                                                                                                                                                                                                                                                                                                                                                                                                                                                                                                                                                                                                                                                                                                                                                                                                                                                                                                                                                                                                                                                                                                                                                                                                                                                                                                                                                                                                                                                                                                                                                                                                                                                                                                                                                 |
| <b>Response to Reviewers:</b>                  | <p>We would like to thank both reviewers for their time to evaluate our manuscript and for their helpful comments/suggestions on our manuscript. It is our belief that this revised manuscript is significantly improved as a result of the changes suggested in the previous round of review. We explained point-by-point the changes made in response to the comments, and highlighted all the changes throughout the revised manuscript in blue. Our replies start with [Response].</p> <p><b>Reviewer #1</b><br/> Image datasets are available and are a valuable community resources. The code is available, which is great. While I definitely appreciate the authors work, I don't think the data support some of the statement throughout the paper, especially when it comes to the wording regarding MLR vs other models, unless further clarification can be provided (Figure 3). In some of the conditions (stress for example) MLR looks better than the other models. The inclusion of color, NIR, and Fluor traits into models is interesting.<br/> [Response] We appreciate the reviewer's assessment of our work and his/her comments on our manuscript. We realized that some of the sentences in the manuscript might be overstated by reading the questions raised below. In the revised manuscript, we changed some parts and gave the statement more carefully (Response 1.7).</p> <p>Lines 14-15: I think this statement needs to be qualified by saying that it is a challenge to find a predictive biomass model across experiments, not that it is a challenge to find a biomass model 'in the context of high-throughput phenotyping', which is vague and I don't think accurate without further clarification considering the number of previous papers that model biomass from images with high correlation to ground truth measurements.<br/> [Response 1.1] We thank the reviewer for this valuable suggestion. We rewrote the statement according to the suggestion in the 'Abstract' section.</p> <p>Lines 34 to 40: lacking in citations of literature. Introduction in general needs improvement in terms of the previous literature that it cites.<br/> [Response 1.2] We thank the reviewer for pointing out this. We have added some new references and re-organized some text in the section 'Introduction' (line 36-44).</p> <p>The second paragraph of the intro is a very limited short review of the literature but there are a number of papers that model biomass using ht-phenotyping that are not represented including Yang et al 2014 (nature communications), Montest et al. 2011 (Field Crops Research), Fahlgren et al. 2015 (Molecular Plant) to name a few.<br/> [Response 1.3] We appreciate the reviewer's nice suggestion. We have added some related references in the revised manuscript (line 44-50).</p> <p>Line 45: "On the other hand, to produce reliable assessments, suitable model types needs to be established and model construction requires integration of many components such as efficient mathematical analysis and representative data." Very vague.<br/> Line 58: Please clarify this statement: "Another concern is that the number of traits used in these studies were quite limited and perhaps not representative enough. Therefore, a more effective and powerful model is needed to overcome these limitations and to allow better utilization of the image-based plant features which are obtained from non-invasive phenotyping approaches." Not sure what this means exactly, very vague considering that the papers mentioned do have models of biomass that are not 'perfect' but do have high heritability and correlation with ground truth measurements.<br/> [Response 1.4/1.5] We have rephrased related sentences in the second paragraph of</p> |

the 'Introduction' section (line 62-65).

I think the authors need to adjust the justification of their research to stress that there needs to be biomass models that can be used across experiments/environment/treatments, which they do say, but needs to be stated more clearly. In general, many of the justification statements, which are pointed out in points 3 and 4 above are obscure to the point that they lose meaning.

[Response 1.6] We rephrased these statements in this revised version (line 69-73).

Line 146: "Although the performance of these models was roughly similar, RF, SVR and MARS methods had better performance than the MLR method for prediction of both FW (Fig. 3B) and DW (Fig. 3D), implying a nonlinear relationship between image-based phenotypic profiles and biomass output." This doesn't seem accurate, it looks like MLR has just as good predictive power in many of the situations presented. I don't think you can say that MLR and the others are roughly similar and then say that this implies a nonlinear relationship. Can this conclusion be clarified? It seems like there are only small differences between the models.

[Response 1.7] We thank the reviewer for cautioning us to avoid overstatements in our manuscript. We have revised the manuscript in the 'Results' section so as not to overstate our observations (line 153-165).

Regardless of whether or not random forest is the 'best' model, the data doesn't seem to support the statement that the RF model 'largely' outperformed the other models. This only seems accurate under the control condition, can this be clarified?

[Response 1.8] We agree with the reviewer that the statement wasn't proper here. We have corrected this point in the revised manuscript.

Line 238: "Although previous attempts have been made to estimate plant biomass from image data, most of these studies consider only a single image-based feature or very few features in their models which are often linear-based, ignoring the fact that the phenotypic components underlying biomass accumulation are presumably complex. Accurately predicting biomass from image data requires efficient mathematical models as well as representative image-derived features." I disagree with the authors on this point, if biomass can be modeled with a few features with high correlation why does it matter if they presume that it is complex? Their more complex models were still decreased in R2 with environmental differences and between experiments and I don't find the data suggesting that RF model outperforming other models (particularly MLR) convincing without further clarification.

[Response 1.9] We agree with the reviewer's comment that it would be good that if biomass can be modelled with a few features with high correlation. What we meant or afraid is that using too less feature might lead to under-estimated or over-estimated results since other features were not considered and evaluated. But nevertheless, we removed this sentence in this revised manuscript.

Reviewer #2:

The authors investigate the ability of deriving plant biomass (both fresh and dry mass) from 2D image-based features acquired with visible, fluorescent and NIR multi-view imaging systems operating on an automated high throughput phenotyping platform. In a first part, several multivariate statistical models are compared for their ability at predicting biomass for two treatments within a single experiment, on three independent datasets, detailed results being presented for one experiment. One of the best model, the random forest, is then further investigated for its capacity at making prediction across experiments, being trained on one experiment at a time or on one treatment of one experiment at a time. Finally, the relative importance of individual image-based traits in the prediction of either fresh or dry weight is presented for two treatments of one dataset.

Models and methods for model evaluation are clearly presented, and the overall quality of the text and Figure makes the paper easy to follow. The inclusion of other than visible images, the objective selection of image-based traits, the comparison of models and the use of 3 independent datasets clearly distinguish this paper from previous publications on the same subject. It provides the reader very valuable information on the current prediction capacity of the approach, together with a consistent methodology for analyzing other related practices.

[Response] We thank the reviewer for his/her assessment of our work and appreciate

that the reviewer recognizes the advantages of our approaches and analysis.

However, I have two major concerns on the current version of this manuscript. First, I think that some conclusions highlighted in the abstract or in the text are not completely in line (or at least sufficiently tempered) with what is demonstrated in the text or shown on the figures. In the abstract (line 19-20), it is highlighted that 'The results proved that plant biomass can be accurately predicted from image-based parameters using a random forest model'. To me this conclusion is clearly supported by data in the case of within experiment predictions, but not fully in the case of the cross experiment test (i.e. quite opposite to what is stressed line 21). My impression, given results presented Figure 5, is that in one case out of two, a model trained on one experiment alone could not accurately (or at least with not the same accuracy) predict the biomass, despite a repeated protocol. This result is per se very interesting, as it demonstrates an important limitation of the approach. It can however not be summarized by what is written line 19-21, 201-202, 209-210 or 253-257. On another occasion (line 148 and line 248), I found the conclusion ('the RF model largely outperformed other models') a bit exaggerated, as, on Figure 3, depending on the criteria, RF model performs very similar to MARS model for example.

[Response 2.1] We thank the reviewer for raising these points. 1) we agree with the reviewer that the prediction accuracy of the model across experiments is still lower in some case (mostly due to growth conditions changing over seasons). We changed relevant description in the text and added some text to discuss this point. 2) We agree with the reviewer on this point. We clarified this point in the revised version (see line 153-165).

Second, I did not manage to test the models, nor to reproduce the analysis with the provided data and source code. Concerning the data, image traits are provided for all experiments, but manual measurement on Dry Weight are missing. Concerning the code, the R-script provided does not fit to the provided dataset, thus making it difficult to test. More important, model code runs with errors at runtime ('not defined' errors). I also think, but this is only a suggestion, that, in addition to raw image files, providing binary masks of plants, that are of high importance for all traits analyzed here, could improve the re-use of this nice dataset.

[Response 2.2] We thank the viewer for raising this point. We now provided a separated R script 'run.R' to test the models. The test data used in our analysis were now deposited in the Github repository (<https://github.com/htpmod/HTPmod>). We also thank for the reviewer for this nice suggestion. Unfortunately, the files for the binary masks of plants were not kept anymore due to storage limitation. But the report files (generated by the IAP software) that include all trait values are still kept. We uploaded these report files alongside the raw image datasets for re-use of these data (see the section 'Availability of supporting data and materials').

Other minor points or comments for specific parts of the texts are provided bellow:

Line 72-74: I think this sentence would be better be placed in the Potential application section

[Response 2.3] We have moved the sentence to the section 'Potential Implications'.

Line 85: Do you mean that some image traits are more sensitive to physiological traits? I do not see why Fig 1B is illustrative for this point.

[Response 2.4] The reviewer is correct that some image traits are more sensitive to physiological traits. We agree with the reviewer that the citation of Fig. 1B is not proper here. We corrected this accordingly.

Line 98: In the context of phenotyping, it might also be useful to add Spearman rank correlation to the assessment

[Response 2.5] We agree with the reviewer's opinion. In principle, the assessment based on these two kinds of correlation coefficients is similar for good models. We prefer to choose Pearson correlation coefficient based on the assumption that the relationship of observed values and predicted values is linear.

Line 108: Fig 1B is only a heatmap image. May be a list of traits should be provided, or a reference to the supplementary data should be added here.

[Response 2.6] We want to thank the reviewer for bringing up this point. We added a reference to the Supplementary Data S1.



Line 117: Figure 2B is poorly informative as traits are not identified. This figure is also not commented in the text, I suggest removing it.  
 [Response 2.7] We agree to the reviewer's suggestion and removed Figure 2B in this revised version.

Line 144: I would find useful to make here perfectly clear that all the models were trained on the control + stress plants, to avoid any confusion with the 'cross treatment test' later on (Figure 6)  
 [Response 2.8] We thank the reviewer for pointing this out. We have corrected this in the revised manuscript.

Line 146-151: I found the analysis a bit confusing as, in the details, the ranking of the different methods varies, and I do not clearly see why RF 'largely outperforms' other methods (especially MARS).  
 [Response 2.9] We agree with the reviewer that this statement is overstated. We have corrected this issue in the revised manuscript (see line 153-165).

Line 152-155: The comparison with the widely used 'single feature' method is very interesting. Can you consider to add its score/line on the R2 and RMSRE?  
 [Response 2.10] This is indeed a good suggestion. We now added this value in Figure 3B and D.

Line 178: May be it is also worth noting in the text that geometric + color traits trust 13 out of 15 (FW) and 15 out of 15 (DW) first places, as these two types of data are widely available among phenotyping platform and yet not so often used in biomass predictions.  
 [Response 2.11] We appreciate the reviewer for this valuable comment. We have included this point in the revised manuscript.

Line 201 - 211: The text seems to me a bit too optimistic regarding the cross experiment predictions. Exp3 clearly shows a non-conservation of the relationship obtained in Exp1 or 2, and a clear loss of predictive power compared to within experiment training.  
 [Response 2.12] We admit that we are a bit overstate here. We have changed it in the revised version.

Line 281: typo: sophisticated  
 [Response 2.13] We appreciate the reviewer for pointing out this mistake. We have corrected this word in the revised manuscript.

Line 349: could you give an idea of the amount of such filled missing values?  
 [Response 2.14] After the feature selection step (e.g., outlier detection, reproducibility analysis and redundancy removal), the missing values for the remaining features are quite rare (much less than 1%).

Line 400: the formulation is a bit strange as it sounds like a conclusion already.  
 [Response 2.15] We have improved this sentence in the revised version.

Line 426: DW data are missing.  
 [Response 2.16] We have added DW data in the Supplemental Data S1.

Line 535: legend of figure 5 did not really apply to these figures. A complete legend should be added.  
 [Response 2.17] A new legend was added for Figure 5.

|                                                                               |                 |
|-------------------------------------------------------------------------------|-----------------|
| <b>Additional Information:</b>                                                |                 |
| <b>Question</b>                                                               | <b>Response</b> |
| Are you submitting this manuscript to a special series or article collection? | No              |
| <b>Experimental design and statistics</b>                                     | Yes             |

|                                                                                                                                                                                                                                                                                                                                                                                                                                                                                                                                                         |            |
|---------------------------------------------------------------------------------------------------------------------------------------------------------------------------------------------------------------------------------------------------------------------------------------------------------------------------------------------------------------------------------------------------------------------------------------------------------------------------------------------------------------------------------------------------------|------------|
| <p>Full details of the experimental design and statistical methods used should be given in the Methods section, as detailed in our <a href="#">Minimum Standards Reporting Checklist</a>. Information essential to interpreting the data presented should be made available in the figure legends.</p> <p>Have you included all the information requested in your manuscript?</p>                                                                                                                                                                       |            |
| <p><b>Resources</b></p> <p>A description of all resources used, including antibodies, cell lines, animals and software tools, with enough information to allow them to be uniquely identified, should be included in the Methods section. Authors are strongly encouraged to cite <a href="#">Research Resource Identifiers</a> (RRIDs) for antibodies, model organisms and tools, where possible.</p> <p>Have you included the information requested as detailed in our <a href="#">Minimum Standards Reporting Checklist</a>?</p>                     | <p>Yes</p> |
| <p><b>Availability of data and materials</b></p> <p>All datasets and code on which the conclusions of the paper rely must be either included in your submission or deposited in <a href="#">publicly available repositories</a> (where available and ethically appropriate), referencing such data using a unique identifier in the references and in the “Availability of Data and Materials” section of your manuscript.</p> <p>Have you have met the above requirement as detailed in our <a href="#">Minimum Standards Reporting Checklist</a>?</p> | <p>Yes</p> |

# Predicting plant biomass accumulation from image-derived parameters

Dijun Chen<sup>1,§,\*</sup>, Rongli Shi<sup>1</sup>, Jean-Michel Pape<sup>1</sup>, Kerstin Neumann<sup>1</sup>, Daniel Arend<sup>1</sup>, Andreas Graner<sup>1</sup>, Ming Chen<sup>2</sup>, and Christian Klukas<sup>1</sup>

<sup>1</sup>*Leibniz Institute of Plant Genetics and Crop Plant Research (IPK), Corrensstrasse 3, 06466 Gatersleben, Germany.*

<sup>2</sup>*Department of Bioinformatics, College of Life Sciences, Zhejiang University, Hangzhou 310058, China.*

<sup>§</sup>Current address: *Department for Plant Cell and Molecular Biology, Institute for Biology, Humboldt-Universität zu Berlin, 10115 Berlin, Germany.*

\*Correspondence should be addressed to D.C. ([chendijun2012@gmail.com](mailto:chendijun2012@gmail.com))

## Abstract

### Background:

Image-based high-throughput phenotyping technologies have been rapidly developed in plant science recently and they provide a great potential to gain more valuable information than traditionally destructive methods. Predicting plant biomass is regarded as a key purpose for plant breeders and ecologist. However, **it is a great challenge to find a predictive biomass model across experiments.**

### Results:

In the present study, we constructed four predictive models to examine the quantitative relationship between image-based features and plant biomass accumulation. Our methodology has been applied to three consecutive barley (*Hordeum vulgare*) experiments with control and stress treatments. The results proved that plant biomass can be accurately predicted from image-based parameters using a random forest model. The high prediction accuracy based on this model, in particular the cross-experiment performance, will contribute to relieve the phenotyping bottleneck in biomass measurement in breeding applications. The relative contribution of individual features for predicting biomass was further quantified, revealing new insights into the phenotypic determinants of plant biomass outcome. Furthermore, the methods could also be used to determine the most important image-based features related to plant biomass accumulation, which would be promising for subsequent genetic mapping to uncover the genetic basis of biomass.

1  
2  
3  
4 **28 Conclusions:**

5  
6 29 We have developed quantitative models to accurately predict plant biomass accumulation from image data.

7  
8 30 We anticipate that the analysis results will be useful to advance our views of the phenotypic determinants of  
9  
10 31 plant biomass outcome, and the statistical methods can be broadly used for other plant species.

11  
12 32 **Keywords:** Barley; High-throughput phenotyping; Phenomics; Biomass; Modeling.  
13  
14 33

15  
16 34 **Introduction**

17  
18  
19 35 Biomass accumulation is an important indicator of crop final product and plant performance. It is thus  
20  
21 36 considered as a key trait in plant breeding, agriculture improvement and ecological applications. The  
22  
23 37 conventional approach of measuring plant biomass is very time consuming and labour intensive since plants  
24  
25 38 need to be harvested destructively to obtain the fresh or dry weight [1]. Moreover, the destructive method  
26  
27 39 makes multiple measurements of the same plant over time impossible. With the development of new  
28  
29 40 technology, digital image analysis has been used more broadly in many fields, as well as in plant research [2-  
30  
31 41 4]. It allows faster and more accurate plant phenotyping and has been proposed as an alternative way to infer  
32  
33 42 plant biomass [2, 3, 5].  
34  
35 43

36  
37 44 In recent years, plant biomass has been subject to intensive investigation by using high-throughput  
38  
39 45 phenotyping (HTP) approaches in both controlled [growth chambers \[2-3, 6-11\]](#) and [field environments \[5,](#)  
40  
41 46 [12-17\]](#), demonstrating that the ability of imaging-based methods to infer plant biomass accumulation. [For](#)  
42  
43 47 [example, significant genotypic and environmental effects on plant biomass and some other traits in Setaria](#)  
44  
45 48 [were revealed by the Bellwether Phenotyping Platform under controlled-environmental condition \[10\]. Yang](#)  
46  
47 49 [et al \[11\] showed that predicted rice biomass \(including shoot fresh and dry weight\) based on image-derived](#)  
48  
49 50 [morphological and texture features provided a relatively more complete representation than manual](#)  
50  
51 51 [measurements in dissecting its genetic architecture. In this regard, optimized models plus image-derived](#)  
52  
53 52 [features from HTP systems will improve the power of dissecting genetic architecture of complex traits.](#)

54  
55 53 Although there are some developed models for predicting plant biomass, most of them have certain  
56  
57 54 limitations. For example, Golzarian *et al.* (2011) modelled the plant biomass (dry weight) in wheat (*Triticum*  
58  
59 55 *aestivum* L.) as a linear function of projected area, assuming plant density was constant. However, this  
60  
61  
62  
63  
64  
65

1  
2  
3  
4  
5  
6  
7  
8  
9  
10  
11  
12  
13  
14  
15  
16  
17  
18  
19  
20  
21  
22  
23  
24  
25  
26  
27  
28  
29  
30  
31  
32  
33  
34  
35  
36  
37  
38  
39  
40  
41  
42  
43  
44  
45  
46  
47  
48  
49  
50  
51  
52  
53  
54  
55  
56  
57  
58  
59  
60  
61  
62  
63  
64  
65

56 method under-estimated dry weight of salt stressed plants and over-estimated that of control plants. Even  
57 though the authors argued that the bias was largely related to plant age and the model might be improved by  
58 including the factor of plant age [3], the differences in plant density between stressed and control plants may  
59 be caused by different physiological properties of plants rather than plant age. In another study, Busemeyer  
60 *et al.* (2013) developed a calibrated biomass determination model for triticale (*x Triticosecale* Wittmack L.)  
61 under field conditions based on multiple linear regression analysis of a diverse set of parameters, considering  
62 both, the volume of the plants and their density. Indeed, this model largely improved the prediction accuracy  
63 of the calibration models based on a single type of parameters and can precisely predict biomass accumulation  
64 across environments [15]. However, they used very limited traits for the model and make it a question whether  
65 it could be applied broadly in other cases. As mentioned by Yang *et al.* (2014), noticeable improvement was  
66 achieved by adding morphological features or texture features to the biomass-predicting model [11]. This  
67 suggests that adding more information/traits could improve the predictive performance of models. Therefore,  
68 a more effective and powerful model is needed to overcome these limitations and to allow better utilization  
69 of the image-based plant features which are obtained from non-invasive phenotyping approaches.

70  
71 Individual studies have recently shown that the prediction accuracy of plant biomass based on image-derived  
72 features is relatively high even using the simplest linear regression models [3,10,18]. However, the  
73 performance of nonlinear predictive models has not been well evaluated. Besides, it is still challenging to  
74 apply these models across experiments that are performed in different environmental conditions or with  
75 different treatments due to lack of representative datasets so far to make reliable assessments. In this study,  
76 we present a general framework for investigating the relationships between plant biomass (referred to as  
77 shoot biomass hereafter) and image-derived parameters. We applied a multitude of supervised and  
78 unsupervised statistical methods to investigate different aspects of biomass determinants by a list of  
79 representative phenotypic traits in three consecutive experiments in barley. The results showed that image-  
80 based features can accurately predict plant biomass output and collectively reflect large proportions of the  
81 variation in biomass accumulation. We elucidated the relative importance of different feature categories and  
82 of individual features in prediction of biomass accumulation. The differences in the contribution of the image-  
83 based features for prediction of two types of biomass measurements, fresh weight and dry weight were

1  
2  
3  
4 84 compared as well. Furthermore, our models were tested for the possibility of predicting plant biomass in  
5  
6 85 different experiments with different treatments.  
7  
8  
9 86

## 11 87 **Results**

### 14 88 **Development of statistical models for modelling plant biomass accumulation using image-based** 15 16 89 **features**

18 90 In the previous studies [19,20], we have shown that a single phenotypic trait -- the three-dimensional digital  
19  
20 91 volume, which is a derived feature from projected side and top areas -- can be reasonably predictive to  
21  
22 92 estimate plant biomass accumulation. We expect that the predictive power could be improved when multiple  
23  
24 93 phenotypic traits are combined in a prediction model since plant biomass is determined not only by their  
25  
26 94 structural features but also by their density (physiological properties). To further investigate the relationship  
27  
28 95 between image-derived parameters and plant biomass accumulation, deep phenotyping data which contain  
29  
30 96 both structural (e.g., geometric traits) and physiological traits (e.g., [plant moisture content as reflected by](#)  
31  
32 97 [near-infrared \[NIR\]-related traits](#)) were analysed (**Fig. 1, A and B**). Pot weights of the plants were not  
33  
34 98 included for the analysis although they were weighed regularly. It might reflect the growth tendency of the  
35  
36 99 whole plants (shoots and roots) where herein we focused mainly on shoots.  
37

38  
39 100  
40 101 Models were constructed to quantify the ability of imaging-based features to statistically predict the biomass  
41  
42 102 accumulation. The models were developed by using four widely used machine-learning methods (**Fig. 1C**):  
43  
44 103 multivariate linear regression (MLR), multivariate adaptive regression splines (MARS), random forest (RF)  
45  
46 104 and support vector regression (SVR), which have extensively been used in accurate prediction of gene  
47  
48 105 expression [21-25] and DNA methylation levels [26-29]. We combined the biomass measurements (fresh  
49  
50 106 weight [FW] and/or dry weight [DW]) with image-based features and then divided them into a training data  
51  
52 107 set and a test data set. A model was trained on the training data set and has then been applied to the test data  
53  
54 108 set to predict the plant biomass. The relationship between plant biomass accumulation and image-based  
55  
56 109 features was assessed based on the criterion of the Pearson correlation coefficient ( $r$ ) between the predicted  
57  
58 110 values and the actual values, or the coefficient of determination ( $R^2$ ; the percentage of variance of biomass  
59  
60  
61  
62  
63  
64  
65



1  
2  
3  
4 111 explained by the model; **Fig. 1D**).

5  
6 112

7  
8 113 Our methodology was applied to three consecutive experiments (**Fig. 2A**; **Supplemental Table S1** and **Data**  
9  
10 114 **S1**), which were designed to investigate vegetative biomass accumulation in response to two different  
11  
12 115 watering regimes under semi-controlled greenhouse conditions in a core set of barley cultivars by non-  
13  
14 116 invasive phenotyping [20, 30]. There were 312 plants with 18 genotypes for each experiment. Plants were  
15  
16 117 monitored using three types of sensors (visible, fluorescence [FLUO] and near-infrared [NIR]) in a  
17  
18 118 LemnaTec-Scanalyzer 3D imaging system. An extensive list of phenotypic traits ranging from geometric  
19  
20 119 (shape descriptors) to physiological properties (i.e., colour-, FLUO- and NIR-related traits) could be extracted  
21  
22 120 from the image data (**Supplemental Data S1**) using our image processing pipeline IAP [19]. A representative  
23  
24 121 list of traits for each plant in the last growth day were selected to test their ability to predict plant biomass.  
25  
26 122

### 27 28 123 **Coordinated patterns of plant-image-based profiles and their relation to plant biomass**

29  
30 124 We extracted a list of representative and non-redundant phenotypic traits for each plant from image datasets  
31  
32 125 for each experiment (see **Materials and Methods**; **Fig. 1B**). In common for these experiments, overall thirty-  
33  
34 126 six high-quality traits which describe plant growth status in the last growth day were obtained. As a result,  
35  
36 127 each dataset was assigned a matrix whose elements were the signals of different features in different plants  
37  
38 128 (**Fig. 1C**). **Principal component analysis (PCA; Fig. 2B)** was applied to these datasets. We found that plants  
39  
40 129 from different experiments with different treatments showed clearly distinct patterns of phenotypic profiles.  
41  
42 130 For instance, stressed plants and control plants were separated using PCA by their first principal component  
43  
44 131 (PC1) and also by the top clusters obtained in HCA, while plants from different experiments were  
45  
46 132 distinguished by PC2 and PC3 in PCA or subordinate clusters in HCA. Accordingly, it could be observed that  
47  
48 133 biomass (e.g., FW) of plants from different experiments with different treatments was significantly different  
49  
50 134 (two-way ANOVA,  $p$ -value  $< 2e-16$ ; **Fig. 2C**). The relationship was reflected by a dendrogram from cluster  
51  
52 135 analysis based on the means of FW over genotypes (**Fig. 2D**). Furthermore, the overall phenotypic patterns  
53  
54 136 of these plants were similar to their biomass output (**Fig. 2, B-D**), revealing that these image-based features  
55  
56 137 were potential factors reflecting the accumulation of plant biomass. We thus explored the relationship  
57  
58 138 between the signals of these image-based features and the level of plant biomass output. We calculated the  
59  
60  
61  
62  
63  
64  
65

1  
2  
3  
4 139 correlation coefficients for each dataset. The correlation patterns were consistent for different datasets and  
5  
6 140 more than half of the features revealed high correlation coefficients ( $r > 0.5$ ; **Fig. 2E**). Interestingly, both  
7  
8 141 structural features (such as digital volume, projected area and the length of the projected plant area border)  
9  
10 142 and density-related features (such as NIR and FLUO intensities) were involved in the top ranked features.  
11

12 143

#### 14 144 **Relating image-based signals to plant biomass output**

15  
16 145 The above analyses suggest that plant biomass can at least be partially inferred from image-based features.  
17  
18 146 To examine which model has the best performance and to select an appropriate model for biomass prediction,  
19  
20 147 we then applied our regression models (**Fig. 1C**) to predict plant biomass using image-based features. Our  
21  
22 148 analyses were focused on the first experiment (i.e., Exp 1), since the phenotypic traits of the corresponding  
23  
24 149 dataset have been intensively investigated in our previous study [20]. In this experiment, plant biomass was  
25  
26 150 quantified in two forms: FW and DW. We selected a collection of 45 image-derived parameters from this  
27  
28 151 dataset that were non-redundant and highly representative.  
29

30 152

31  
32  
33 153 We next tried to predict FW and DW based on this set of image-derived features using four different  
34  
35 154 regression models (MLR, RF, SVR and MARS; **Fig. 3**). The models were respectively tested on control  
36  
37 155 plants, stressed plants and the whole set of plants (**Fig. 3, A and C**). The prediction accuracy of our models  
38  
39 156 (the correlation coefficients between the predicted biomass and the actual biomass) was firstly compared  
40  
41 157 with the ability of individual features to predict biomass. It was found that our models generally showed  
42  
43 158 better prediction power than the single digital volume-based prediction (**Fig. 3, B and D**), indicating that  
44  
45 159 additional features improved the predictive power. Then the performance of these models was compared and  
46  
47 160 evaluated. Overall, the performance of all the tested models showed roughly similar for the prediction of both  
48  
49 161 FW (**Fig. 3B**) and DW (**Fig. 3D**) under stressed conditions. The prediction accuracy of our models is still  
50  
51 162 comparable to the results from previous studies [3, 6, 18] based on MLR models, even though much more  
52  
53 163 features were considered in our study. The RF model slightly outperformed other models in predicting  
54  
55 164 biomass of control plants, accounting for the most variance ( $R^2 = 0.85$  for FW and  $R^2 = 0.62$  for DW; **Fig.**  
56  
57 165 **3, B and D**, left panels) and showed the best prediction accuracy (Pearson's correlation  $r = 0.93$  for FW and  
58  
59 166  $r = 0.80$  for DW; **Fig. 3, B and D**, middle panels). Of note, RF is the only model showing better performance  
60  
61  
62  
63  
64  
65

1  
2  
3  
4 167 than single digital volume-based prediction (Fig. 3D). In this study, we focused on the results from the RF  
5  
6 168 method in the rest of analysis, although results from different methods were highly consistent and led to the  
7  
8 169 same conclusions.  
9

10 170

### 11 171 **Relative importance of different image-based features for predicting plant biomass**

12  
13  
14 172 As mentioned above, the image-based features could be classified broadly into four categories: plant structure  
15  
16 173 properties, colour-related features, NIR signals, and FLUO-based traits (Fig. 1B). The last three types of  
17  
18 174 features reflect plant physiological properties and can be considered as plant density-related traits and are  
19  
20 175 thus related to their fresh or dry matter content. For each individual feature or each type of features, we  
21  
22 176 constructed a degenerate model for biomass prediction using the corresponding feature(s) as the predictor(s).  
23  
24 177 We compared the capability of each individual or type of feature for predicting biomass accumulation in the  
25  
26 178 first experiment (i.e., experiment 1). Geometric features showed the most predictive power among the four  
27  
28 179 categories for prediction of both FW and DW, but were slightly less predictive than all features in a full model  
29  
30 180 (Fig. 4, A and B). Strikingly, the predictability of other types of features (such as colour-related and FLUO-  
31  
32 181 based traits) was substantial, indicating that these traits may act as unforeseen factors in biomass prediction.  
33  
34 182 In addition, the NIR-based features showed higher predictive capability for FW than for DW in control and  
35  
36 183 stressed plants, revealing NIR signals were import factors in determining FW accumulation.  
37  
38 184

39 184

40  
41 185 Next, we investigated the relative importance (RI) of each feature for predicting biomass using a full model  
42  
43 186 in the whole set of plants (i.e., “control + stressed plants”; Fig. 4, C and D, upper panels). In a RF model, the  
44  
45 187 RI of a feature is calculated as the increase of prediction error (%IncMSE) when phenotypic data for this  
46  
47 188 feature is permuted [31], and thus indicates the contribution of the feature after considering its intercorrelation  
48  
49 189 in a model. We found that the top ten most important features in the full model for predicting FW and DW  
50  
51 190 included both structure and density-related traits. As expected, projected area (from side or top view) and  
52  
53 191 digital volume were the top ranked features, which have individually been considered as proxies of shoot  
54  
55 192 biomass in previous studies [3, 20, 18, 32-37]. However, several geometric and colour-related features that  
56  
57 193 are top ranked in the prediction have not been used in biomass predictions in previous analysis although they  
58  
59 194 are widely available among phenotyping platforms.  
60  
61  
62  
63  
64  
65

1  
2  
3  
4 195

5  
6 196 In principle, we would expect that highly important features in the full model would be related to a high  
7  
8 197 predictive power in a degenerate model. Surprisingly, there was no clear correlation observed between the  
9  
10 198 feature importance and their predictive power (**Fig. 4, C and D**). For example, several colour-related and  
11  
12 199 NIR-based features which were in the top ten list of the most important features revealed insubstantial  
13  
14 200 predictive power in individual models. This observation implies that the relation of the underlying biomass  
15  
16 201 determinants is extremely complex and not a linear combinations of the investigated features.  
17

18 202

19  
20 203 Furthermore, we compared the relative importance of each feature in predicting FW and DW (**Fig. 4E**).  
21  
22 204 Although a positive correlation ( $r = 0.88$ ) between the feature importance for FW and DW could be observed,  
23  
24 205 several features showed large differences in their ability to interpret FW or DW, including “nir.intensity”  
25  
26 206 (derived from side view images), “compactness.01” (top), “hull.pc1” (top), “leaf.count” (side),  
27  
28 207 “hsv.h.average” (top) and “lab.a.mean” (top). For instance, NIR intensity and plant compactness (top view)  
29  
30 208 may be important for predicting FW but not for DW. We also performed the above analyses by using only  
31  
32 209 control (**Supplemental Fig. S1**) or stressed plants (**Supplemental Fig. S2**), respectively. We found that the  
33  
34 210 patterns of feature importance were distinct between these two groups of plants. For example, NIR intensity  
35  
36 211 was ranked as the top fifth feature for predicting FW for stressed plants but was not substantially important  
37  
38 212 for control plants. These findings suggest that there are differences in underlying plant biomass determinants  
39  
40 213 in these kinds of treatment situations that are also reflected by their image-based phenotypic traits.  
41

42 214

43  
44  
45 215 **Image-based features are predictive of plant biomass across experiments with similar conditions or**  
46  
47 216 **treatments**

48  
49 217 In order to explore whether our models were generalizable across different experiments, we applied our  
50  
51 218 models trained in one experiment to predict biomass (herein FW) in other experiments using a common set  
52  
53 219 of features. Examples of such cross-experiment predictions are shown in **Figure 5A**. We tested and illustrated  
54  
55 220 all possibilities for cross prediction using the whole set of plants in the corresponding experiment. In general,  
56  
57 221 the prediction accuracy within individual experiments remained high ( $r > 0.97$  and  $R^2 > 0.93$  for all three  
58  
59 222 experiments; **Fig. 5B**), revealing that our models were effectively predicting plant biomass based on image-

1  
2  
3  
4 223 derived feature signals among different experiments. Moreover, the prediction accuracy for cross-experiment  
5  
6 224 prediction, especially between the first two experiments ( $r > 0.97$  and  $R^2 > 0.94$ ), was still relatively high,  
7  
8 225 implying that our models generally captured the relationships among the various image-based features.  
9  
10 226 However, the third experiment had relative weaker correlations with the other two experiments for predicting  
11  
12 227 biomass (with  $r > 0.81$  and  $R^2 > 0.65$ ; **Fig. 5A**). This might be mainly due to seasonal (temperature and  
13  
14 228 illumination) differences which caused different plants behaviours, namely lower biomass for both control  
15  
16 229 and stressed plants in experiment 3 [30]. This suggests that different plant growth conditions might cause  
17  
18 230 some variation for cross-experiment prediction.  
19

20  
21 231  
22 232 At the same time, we tested cross predictability of our models using treatment-specific data in the experiments  
23  
24 233 (**Fig. 6**). Similar results were obtained as above using the whole dataset (**Fig. 5B**). The weak predictive power  
25  
26 234 for cross-prediction involving control plants from the third experiment was most clearly observable in the  
27  
28 235 low accuracy in the biomass prediction of this particular subset of plants. Generally, control and stressed  
29  
30 236 plants were found to have very weak predictive power when related to each other (**Fig. 6**), as also supported  
31  
32 237 by the distinct patterns of relative feature importance between these two plant groups (**Supplemental Figs.**  
33  
34 238 **S1 and S2**). For each experiment, the prediction accuracy was higher for stressed plants compared to control  
35  
36 239 plants. This might resulted from the imaging analysis process. Relatively small plants, stressed plants in this  
37  
38 240 case, would gain more clear images due to less overlapping or less area of out range. Therefore, image quality  
39  
40 241 would be an important variation source for our modelling and should be taking into consideration for any  
41  
42 242 application.  
43  
44 243

## 48 244 **Discussion**

49  
50  
51 245 Biomass is a complex but important trait in functional ecology and agronomy for studying plant growth, crop  
52  
53 246 productive potential and plant regeneration capabilities. Many different techniques, either destructive or non-  
54  
55 247 destructive, have been used to estimate biomass [1, 2-3, 5-17]. Compared with the traditional destructive  
56  
57 248 methods for measuring biomass, non-destructive imaging methods provide a faster, more accurate approach  
58  
59 249 for plant phenotyping. In recent years, more and more high-throughput plant phenotyping platforms have  
60  
61  
62  
63  
64  
65

1  
2  
3  
4  
5  
6  
7  
8  
9  
10  
11  
12  
13  
14  
15  
16  
17  
18  
19  
20  
21  
22  
23  
24  
25  
26  
27  
28  
29  
30  
31  
32  
33  
34  
35  
36  
37  
38  
39  
40  
41  
42  
43  
44  
45  
46  
47  
48  
49  
50  
51  
52  
53  
54  
55  
56  
57  
58  
59  
60  
61  
62  
63  
64  
65

250 been set up and applied worldwide. Accordingly, it becomes a current challenge to establish models utilizing  
251 the big datasets gained from high-throughput imaging systems. Accurately predicting biomass from image  
252 data requires efficient mathematical models as well as representative image-derived features.

253

254 In this study, we have presented a systematic analysis of relationships between plant biomass accumulation  
255 and image-derived signals, to confirm the assumption that biomass can be accurately predicted from image-  
256 based parameters. We built a random forest model of biomass accumulation using a comprehensive list of  
257 representative image-based features. The comparison between a random forest model and alternative  
258 regression models indicated that the RF model outperforms other models in terms of (1) better predictive  
259 power – especially in comparison with the linear model, confirming the complex phenotypic architecture of  
260 biomass, (2) better outperformance than a single-feature-prediction model – arguing the complex phenotypic  
261 makeup of biomass, and (3) feasible biological interpretability – the ability to readily extract information  
262 about the importance of each feature in prediction. The high prediction accuracy based on this model, in  
263 particular the cross-experiment performance, is promising to relieve the phenotyping bottleneck in biomass  
264 measurement in breeding applications. For example, based on an established small reference dataset which  
265 is used to train a RF model, it is possible to predict biomass in several large plant populations within one  
266 experiment or across several experiments using image data by taking advantage of high-throughput  
267 phenotyping technologies. Alternatively, the model can be trained from a much larger reference panel of  
268 plants that are grown in diverse environmental conditions which is then applied to a diverse set of experiments.  
269 The first evidence for this notion is the observation that our model showed more predictive power in plants  
270 with two treatments than with a single treatment (**Fig. 3, B and D**). Indeed, when applying our model to the  
271 combined dataset from all the three experiments, we found the prediction accuracy remains very high ( $R^2 =$   
272  $0.96$  and  $r = 0.98$ , average values from ten times of ten-fold cross-validation). To keep the high prediction  
273 accuracy in other application, there are some points should be take caution. Considering the environmental  
274 effects on biomass accumulation, the application of our model will require the testing experiments showing  
275 similar conducted conditions with that of the reference experiments. This means the plant cultivation  
276 conditions should be standardized and any noise which might lower image quality should be avoided.  
277 Another approach to improve applicability of models, which could not be tested in this study, would be to



1  
2  
3  
4  
5  
6  
7  
8  
9  
10  
11  
12  
13  
14  
15  
16  
17  
18  
19  
20  
21  
22  
23  
24  
25  
26  
27  
28  
29  
30  
31  
32  
33  
34  
35  
36  
37  
38  
39  
40  
41  
42  
43  
44  
45  
46  
47  
48  
49  
50  
51  
52  
53  
54  
55  
56  
57  
58  
59  
60  
61  
62  
63  
64  
65

278 improve the data base for the training, by acquiring data from additional environment sensors. Temperature,  
279 humidity, and illumination data would certainly help to explain differences in the growth patterns among  
280 experiments, performed in different growth seasons. To this end, we expect that our approach is extensible  
281 by incorporating such sensor data in the data matrices. Furthermore, our results can provide suggestive hints  
282 for biologists to setup phenotyping infrastructures for investigation of plant biomass. For instance, a visible  
283 light imaging system would be sufficient to accurately predict fresh weight based on the observation that  
284 geometric features alone show high prediction accuracy (**Fig. 4A**). However, to investigate dry weight, it  
285 would be helpful to include an additional near-infrared camera system under normal growth conditions and  
286 an additional fluorescence camera system under drought stress conditions (**Fig. 4B**).

287  
288 In contrast to previous studies [2-3, 6-7, 18, 32-37], in which biomass was investigated using only single  
289 image-derived parameter (such as projected area) or several geometric parameters, our analyses extended  
290 these studies by incorporating more representative features that cover both structural and physiological-  
291 related properties into a [more sophisticated model](#). Although the predictive power of our model is roughly  
292 higher than that of single feature-based prediction, such as the digital volume (**Fig. 3**) [20], our model also  
293 reveals the relative contribution of individual feature in prediction of biomass. The information regarding the  
294 importance of each feature will offer new insights into the phenotypic determinants of plant biomass outcome.  
295 Interestingly, we found that several top ranked features, such as digital volume and NIR intensity, showed  
296 genetic correlations with biomass of fresh weight (**Fig. 4C**) [20], implying these top ranked features may  
297 represent the main “phenotypic components” of biomass outcome and can be further used to dissect genetic  
298 components underlying biomass accumulation. As image-based high-throughput phenotyping in plants  
299 developed mainly in recent years and therefore few corresponding modelling studies have been performed,  
300 we believe that our model could be further improved when new types of cameras and/or newly defined  
301 features are available.

302  
303 In summary, we have developed a quantitative model for dissecting the phenotypic components of biomass  
304 accumulation based on image data. Apart from predicting biomass outcome, the methods can be used to  
305 determine the most important image-based features related to plant biomass accumulation, which are

1  
2  
3  
4 306 promising for subsequent genetic mapping to uncover the genetic basis of biomass.  
5  
6

7 307  
8  
9

## 10 308 **Potential Implications**

11  
12 309 As high-throughput plant phenotyping is a technique which is becoming more and more widely used for  
13  
14 310 automated phenotype in plant research, especially in plant breeding, we anticipate that the methodologies  
15  
16 311 proposed in this work will have various potential applications. We anticipate that the analysis results will be  
17  
18 312 useful to advance our views of the phenotypic determinants of plant biomass outcome, and the statistical  
19  
20 313 methods can be broadly used for other plant species and therefore assist plant breeding in the context of  
21  
22 314 phenomics.  
23

24 315  
25  
26

## 27 316 **Materials and Methods**

### 28 29 317 **Germplasm and experiments**

30  
31  
32 318 Barley plant image data were obtained as described previously [20, 30]. Briefly, a core set of 16 two-rowed  
33  
34 319 spring barley cultivars (*Hordeum vulgare* L.) and two parental cultivars of a double haploid (DH) were  
35  
36 320 monitored for vegetative biomass accumulation. Three independent experiments with identical setup were  
37  
38 321 performed in a (semi-) controlled greenhouse at IPK by using the automated phenotyping and imaging  
39  
40 322 platform LemnaTec-Scanalyzer 3D. Experiments were performed consecutively from May to November  
41  
42 323 2011 over a period of 58 days each (**Supplemental Table S1**). The greenhouse setup enabled sowing for the  
43  
44 324 next experiment already 2 days before the old experiment ended. For this, new pots were placed in the middle  
45  
46 325 of the greenhouse, while the old experiment was still on the conveyer belts.  
47

48 326  
49

50 327 Each experiment consisted of two treatments: well-watered (control treatment) and water limited (drought  
51  
52 328 stress treatment). In each treatment, nine plants per core set cultivar as well as six plants per DH parent were  
53  
54 329 tested. This resulted in a total of 312 plants per experiment, corresponding to the maximal capacity of the  
55  
56 330 phenotyping platform. Watering and imaging were performed daily. Drought stress was imposed by  
57  
58 331 intercepting water supply from 27 days after sowing (DAS 27) to DAS 44. Stressed plants were re-watered  
59  
60  
61  
62  
63  
64  
65

1  
2  
3  
4 332 at DAS 45. In total, for each of the experiments about 100 GB of raw (image) data was accumulated. At the  
5  
6 333 end of experiments (DAS 58), plants were harvested to measure above-ground biomass in form of plant fresh  
7  
8 334 weight (FW; for all experiments) and/or dry weight (DW; for experiment 1).  
9

10 335

### 11 336 **Image analysis**

12  
13  
14 337 Image datasets were processed by the barley analysis pipelines in the IAP software (version v1.1.2) [19].  
15  
16 338 Analysed results were exported in the csv file format via IAP functionalities, which can be used for further  
17  
18 339 data inspection. The result table includes columns for different phenotypic traits and rows as plants are  
19  
20 340 imaged over time. The corresponding metadata is included in the result table as well.  
21

22 341

23  
24 342 Each plant was characterized by a set of phenotypic traits also referred to as features, which were grouped  
25  
26 343 into four categories: geometric features, fluorescence-related (FLUO-related) features, colour-related  
27  
28 344 features and near-infrared-related (NIR-related) features. These traits were defined by considering image  
29  
30 345 information from different cameras (visible light, fluorescence and near infrared) and imaging views (side  
31  
32 346 and top views). See the IAP online documentation (<http://iapg2p.sourceforge.net/documentation.pdf>) for  
33  
34 347 details about trait definition.  
35

36 348

### 37 349 **Feature selection**

38  
39  
40 350 Feature selection was performed with the same procedure as described in [20]. We applied the feature  
41  
42 351 selection technique to each dataset. Generally, we captured almost identical subset features from different  
43  
44 352 datasets. We manually added several representative traits due to removal by variance inflation factors. For  
45  
46 353 example, the digital volume and projected area are highly correlated with each other but we kept both of  
47  
48 354 them, because we would investigate the predictive power of both features. Moreover, the regression models  
49  
50 355 we used are insensitive to collinear features. We thus kept as much representative features as possible. To  
51  
52 356 apply the prediction models among different datasets, a common set of features supported by all the datasets  
53  
54 357 was used.  
55

56 358

### 57 359 **Data transformation**

60  
61  
62  
63  
64  
65

1  
2  
3  
4 360 Each plant can be presented by a representative list of phenotypic traits, resulting in a matrix  $X_{n \times m}$  for each  
5  
6 361 experiment, where  $n$  is the number of plants and  $m$  is the number of phenotypic traits. Missing values were  
7  
8 362 filled by mean values of other replicated plants. To make the image-derived parameters from diverse sources  
9  
10 363 comparable, we normalized the columns of  $X$  by dividing the values with the maximum value of each column  
11  
12 364 across all plants. Plants with empty values of manual measurements (FW and DW) were discarded for  
13  
14 365 analysis. These transformed data sets were subjected to regression models.  
15  
16 366

### 17 367 **Hierarchical clustering analysis and PCA**

18  
19  
20 368 Hierarchical clustering analysis (HCA) and principle component analysis (PCA) were performed on the  
21  
22 369 transformed data matrix  $X_{n \times m}$  in the same way as described in [20]. We also performed HCA using the  
23  
24 370 genotype-level mean value of FW data to check the similarity of overall plant growth patterns in different  
25  
26 371 experiments.  
27

### 28 372

### 29 373 **Models for predicting plant biomass**

30  
31  
32 374 To understand the underlying relationship between image-derived parameters and the accumulated biomass  
33  
34 375 (such as FW and DW), we constructed predictive models based on four different machine-learning methods:  
35  
36 376 multivariate linear regression (MLR), multivariate adaptive regression splines (MARS), random forest (RF)  
37  
38 377 and support vector regression (SVR). In these models, the normalized phenotypic profile matrices  $X_{n \times m}$  for  
39  
40 378 a representative list of phenotypic traits were used as predictors (explanatory variables) and the measured  
41  
42 379 DW/FW as the response variable  $Y$ .  
43  
44 380

45  
46 381 All these models were implemented in R (<http://www.r-project.org/>; release 2.15.2). To assess the relative  
47  
48 382 contribution of each phenotypic trait to predicting the biomass. We also calculated the relative feature  
49  
50 383 importance for each model. Specifically, for the MLR model, we used the “lm” function in the base  
51  
52 384 installation packages. The relative importance of predictor variables in the MLR model was estimated by a  
53  
54 385 heuristic method [38] which decomposes the proportionate contribution of each predictor variable to  $R^2$ . For  
55  
56 386 MARS, we used the “earth” function in the *earth* R package. The “number of subsets (nsubsets)” criterion  
57  
58 387 (counting the number of model subsets that include the variable) was used to calculate the variables feature  
59  
60  
61  
62  
63  
64  
65

1  
2  
3  
4 388 importance, which is implemented in the “evimp” function. For the RF model, we used the *randomForest* R  
5  
6 389 package which implements Breiman's random forest algorithm [31]. We chose the “%IncMSE” (increase of  
7  
8 390 mean squared error) to represent the criteria of relative importance measure. For SVR, we utilized the *e1071*  
9  
10 391 R package which provides functionalities to use the *libsvm* library [39]. The absolute values of the  
11  
12 392 coefficients of the normal vector to the “optimal” hyperplane can be considered as the relative importance of  
13  
14 393 each predictor variable contributing to regression [40, 41].  
15  
16 394

### 18 395 **Evaluation of the prediction models**

20 396 To evaluate the performance of the predictive models, we adopted a 10-fold cross-validation strategy to check  
21  
22 397 the prediction power of each regression model. Specifically, each dataset was randomly divided into a training  
23  
24 398 set (90% of plants) and a testing set (10% of plants). We trained a model on the training data and then applied  
25  
26 399 it to predict biomass for the testing data. Afterwards, the predicted biomass in the testing set was compared  
27  
28 400 with the manually measured biomass. The predictive accuracy of the model can be measured by

- 30 401 1) the Pearson correlation coefficient (PCC;  $r$ ) between the predicted values and the observed values;  
31  
32 402 2) the coefficient of determination ( $R^2$ ) which equals to the fraction of variance of biomass explained  
33  
34 403 by the model, defined as

$$37 \quad 404 \quad R^2 = 1 - \frac{SS_{res}}{SS_{tot}} = 1 - \frac{\sum_{i=1}^n (y_i - \hat{y}_i)^2}{\sum_{i=1}^n (y_i - \bar{y})^2}$$

40 405 where  $SS_{res}$  and  $SS_{tot}$  are the sum of squares for residuals and the total sum of squares, respectively,  $\hat{y}_i$  the  
41  
42 406 predicted and  $y_i$  the observed biomass of the  $i$ th plant,  $\bar{y}$  is the mean value of the observed biomass; and

- 44 407 3) the root mean squared relative error of cross-validation, defined as

$$48 \quad 408 \quad \text{RMSRE} = \sqrt{\frac{\sum_{i=1}^s \left( \frac{y_i - \hat{y}_i}{y_i} \right)^2}{s}}$$

51 409 where  $s$  denotes the sample size of the testing dataset.

53 410 We repeated the cross-validation procedure ten times. The mean and standard deviation of the resulting  $R^2$   
54  
55 411 and RMSRE values were calculated across runs.

57 412  
58  
59 413 [To evaluate the applicability of our methods across seasons \(thus different growth environments\) and](#)  
60  
61  
62  
63  
64  
65

1  
2  
3  
4 414 treatments (e.g., control versus drought stress) in the same season, we applied the models in different contexts  
5  
6 415 with cohort validation. Specifically, we trained the biomass prediction models under one specific context and  
7  
8 416 predicted biomass in another different context and *vice versa*. The predictive accuracy of the model was  
9  
10 417 evaluated based on the measures  $R^2$  and RMSRE as described above. Furthermore, the predictive power was  
11  
12 418 reflected by the bias  $\mu$  between the predicted and observed values, defined as

$$\mu = \frac{1}{n} \cdot \sum_{i=1}^n \frac{\hat{y}_i - y_i}{y_i}$$

13  
14  
15 419  
16  
17  
18 420 where  $n$  denotes the sample size of the dataset. This bias indicates over- ( $\mu > 0$ ) or under-estimation ( $\mu < 0$ )  
19  
20 421 of biomass.

#### 21 22 422 23 24 423 **Availability of source code and requirements**

- 25  
26 424 • Project name: Modeling of plant biomass accumulation with HTP data
- 27  
28 425 • Project home page: <https://github.com/htpmod/HTPmod>
- 29  
30 426 • Operating system(s): Windows, Linux and Mac OS.
- 31  
32 427 • Programming language: R
- 33  
34 428 • License: open source under GNU GPL v3.0.

#### 35 36 429 37 38 430 **Availability of supporting data and materials**

39  
40 431 [The raw image data sets as well as analysed data](#) supporting the results of this article are available in the PGP  
41  
42 432 repository [42] under XXXX (please use the following links for review: [https://doi.ipk-](https://doi.ipk-gatersleben.de/DOI/aee46b58-628f-4f8b-9097-0c87cdc2fb39/e281580f-58a8-4a95-9b16-a89e22bba55e/2/1847940088)  
43  
44 433 [gatersleben.de/DOI/aee46b58-628f-4f8b-9097-0c87cdc2fb39/e281580f-58a8-4a95-9b16-](https://doi.ipk-gatersleben.de/DOI/aee46b58-628f-4f8b-9097-0c87cdc2fb39/e281580f-58a8-4a95-9b16-a89e22bba55e/2/1847940088)  
45  
46 434 [a89e22bba55e/2/1847940088](https://doi.ipk-gatersleben.de/DOI/aee46b58-628f-4f8b-9097-0c87cdc2fb39/e281580f-58a8-4a95-9b16-a89e22bba55e/2/1847940088), [https://doi.ipk-gatersleben.de/DOI/269b0f6b-2bf9-4d31-b6b0-](https://doi.ipk-gatersleben.de/DOI/269b0f6b-2bf9-4d31-b6b0-70639a8416a2/2c368112-3f49-467f-9cc1-71b33323b2a0/2/1847940088)  
47  
48 435 [70639a8416a2/2c368112-3f49-467f-9cc1-71b33323b2a0/2/1847940088](https://doi.ipk-gatersleben.de/DOI/269b0f6b-2bf9-4d31-b6b0-70639a8416a2/2c368112-3f49-467f-9cc1-71b33323b2a0/2/1847940088), and  
49  
50 436 [https://doi.ipk-gatersleben.de/DOI/d87676ef-9327-4675-99a2-55a2bd0d95fa/8dbaf3cb-b644-4162-95b1-](https://doi.ipk-gatersleben.de/DOI/d87676ef-9327-4675-99a2-55a2bd0d95fa/8dbaf3cb-b644-4162-95b1-2f925fe9dfba/2/1847940088)  
51  
52 437 [2f925fe9dfba/2/1847940088](https://doi.ipk-gatersleben.de/DOI/d87676ef-9327-4675-99a2-55a2bd0d95fa/8dbaf3cb-b644-4162-95b1-2f925fe9dfba/2/1847940088)), according to the ISA-Tab format and the recommendations of the MIAPPE  
53  
54 438 (Minimum Information About a Plant Phenotyping Experiment) standard [43]. The selected data for  
55  
56 439 modelling are available in the **Supplemental Data S1**.

57  
58  
59 440  
60  
61  
62  
63  
64  
65



1  
2  
3  
4  
5  
6  
7  
8  
9  
10  
11  
12  
13  
14  
15  
16  
17  
18  
19  
20  
21  
22  
23  
24  
25  
26  
27  
28  
29  
30  
31  
32  
33  
34  
35  
36  
37  
38  
39  
40  
41  
42  
43  
44  
45  
46  
47  
48  
49  
50  
51  
52  
53  
54  
55  
56  
57  
58  
59  
60  
61  
62  
63  
64  
65

441 **Declarations**

442 **List of abbreviations**

443 DAS: Days After Sowing

444 DW: Dry Weight

445 FLUO: Fluorescence

446 FW: Fresh Weight

447 HCA: Hierarchical Clustering Analysis

448 HTP: High-Throughput Phenotyping

449 MLR: Multivariate Linear Regression

450 MARS: Multivariate Adaptive Regression Splines

451 NIR: Near-Infrared

452 PCA: Principal Component Analysis

453 PCC: Pearson Correlation Coefficient

454 RF: Random Forest

455 RMSRE: Root Mean Squared Relative Error

456 SVR: Support Vector Regression

457

458 **Consent for publication**

459 Not applicable.

460

461 **Funding**

462 This work was supported by the Leibniz Institute of Plant Genetics and Crop Plant Research (IPK), the Robert

463 Bosch Stiftung (32.5.8003.0116.0) and the Federal Agency for Agriculture and Food (BEL, 15/12-13, 530-

464 06.01-BiKo CHN) and the Federal Ministry of Education and Research (BMBF, 0315958A and 031A053B).

465 This research was furthermore enabled with support of the European Plant Phenotyping Network (EPPN,

466 grant agreement no. 284443) funded by the FP7 Research Infrastructures Programme of the European Union.

467

468 **Competing interests**

1  
2  
3  
4  
5  
6  
7  
8  
9  
10  
11  
12  
13  
14  
15  
16  
17  
18  
19  
20  
21  
22  
23  
24  
25  
26  
27  
28  
29  
30  
31  
32  
33  
34  
35  
36  
37  
38  
39  
40  
41  
42  
43  
44  
45  
46  
47  
48  
49  
50  
51  
52  
53  
54  
55  
56  
57  
58  
59  
60  
61  
62  
63  
64  
65

469 The authors declare that they have no competing interests.

470

471 **Author contributions**

472 D.C. designed the research. C.K. and M.C. supervised the project. K.N. and G.A. performed the LemnaTec  
473 experiments. D.A. created the ISA-Tab formatted description and uploaded data records in the PGP repository.  
474 J.M.P. and C.K. analyzed image data. D.C. implemented the methods, analyzed data, interpreted the results,  
475 and wrote the manuscript with contribution from R.S.. All authors read and approved the final version of the  
476 article.

477

478 **Acknowledgements**

479 We would like to thank Ingo Mücke for his management of the LemnaTec system operations. We thank  
480 Michael Ulrich for performing software tests and helping in data analysis. [We would like to thank two](#)  
481 [anonymous referees for their helpful comments and suggestions.](#)

482

## 483 **Figure Legends**

484 **Figure1.** Modeling pipeline for predicting plant biomass accumulation based on image-derived parameters.

485 (A) Input data, including high-throughput image data and manually measured biomass data. Plants were  
486 phenotyped using various cameras such as visible (or color), fluorescence (FLUO) and near-infrared (NIR)  
487 sensors. Image analysis was performed with IAP software [10] for feature extraction. The same plants were  
488 harvested and measured at the end of growth. Generally, two types of biomass were measured: fresh weight  
489 (FW) and dry weight (DW). (B) Trait processing. All the phenotypic traits were grouped into four categories:  
490 geometric, color-related, FLUO-related and NIR-related traits. Phenotypic data were subjected to quality  
491 check to remove low-quality data. (C) Each plant was described by a list of traits, resulting in a predictor  
492 matrix whose rows represent plants and columns represent image-based traits. This matrix was used to  
493 predicted plant biomass accumulation by MLR (multivariate linear regression), MARS (multivariate adaptive  
494 regression splines), RF (random forest) and SVR (support vector regression) models. The right panel  
495 represents the schema of model validation. In the first schema, a dataset (Dataset 1) was divided into training  
496 set and testing set in a ten-fold cross-validation manner. In the second schema, the whole of one dataset  
497 (Dataset 1) was used for training and another dataset (Dataset 2) was used for testing. (D) Model selection,  
498 evaluation and result interpretation. The correlation of the predicted values and measured values was used to  
499 assess the overall performance of the model.

500

501 **Figure 2.** Predictability of image-based traits to plant biomass.

502 (A) Schema depicting three consecutive high-throughput phenotyping experiments in barley. Plants in each  
503 experiment were harvested for biomass measurements: fresh weight (FW; for all experiments) and dry weight  
504 (DW; only for experiment 1). (B) Scatter plots showing projections of the top four Principal components  
505 (PCs) based on PCA of image-based data. The component scores (shown in points) are colored and shaped  
506 according to the experiments (as legend listed in the box). The component loading vectors (represented in  
507 lines) of all traits (as colored according to their categories) were superimposed proportionally to their  
508 contribution. (C) Boxplot showing the distribution of FW across different experiments. (D) A dendrogram  
509 from cluster analysis based on the means of FW data over genotypes. (E) Pearson's correlation (mean values  
510 in the three datasets) between image-based traits and FW. Traits with the largest mean correlations values are

1  
2  
3  
4 511 labeled: 1 -- sum of leaf length (side view), 2 -- sum of FLUO intensity (side), 3 -- plant area border length  
5  
6 512 (side), 4 -- sum of NIR intensity (top), 5 -- sum of FLUO intensity (top), 6 -- projected area (top), 7 --  
7  
8 513 projected area (side) and 8 -- digital volume.  
9

10 514

11  
12 515 **Figure 3.** Quantitative relationship between image-based features and plant biomass.

13  
14 516 (A) and (C) Scatter plots of manually measured plant biomass (fresh weight [FW] and dry weight [DW])  
15  
16 517 versus predicted biomass values using four prediction models: multivariate linear regression (MLR),  
17  
18 518 multivariate adaptive regression splines (MARS), random forest (RF) and support vector regression (SVR).  
19  
20 519 The red line indicates the expected prediction ( $y = x$ ). The quantitative relationship between image-based  
21  
22 520 features and biomass was evaluated by Pearson's correlation coefficient (PCC  $r$  and its corresponding  $p$ -  
23  
24 521 value), RMSRE (root mean squared relative error) and the percentage of variance explained by the models  
25  
26 522 (the coefficient of determination  $R^2$ ). (B) and (D) Summary of the predictive power of each regression model.  
27  
28 523 The results were based on ten-fold cross-validation with ten trials. Models were evaluated based on control  
29  
30 524 plants, stressed plants and the whole set of plants. The solid lines represent the predictive performance based  
31  
32 525 on the single “digital volume” feature.  
33

34 526

35  
36  
37 527 **Figure 4.** The relative importance of image-based features in prediction of plant biomass.

38  
39 528 The capabilities of different types of image-based features to predict plant biomass based on evaluation of  
40  
41 529 either fresh weight (FW) (A) or dry weight (DW) (B). The overall predictive accuracies of each type of  
42  
43 530 features are indicated. Grey bar denote the predictive accuracy using all features. The relative importance of  
44  
45 531 each feature in the Random Forest model (upper panel) and the predictive accuracy of each individual feature  
46  
47 532 as the single predictor (lower panel) based on investigation of either FW (C) or DW (D). The calculation was  
48  
49 533 based on the whole set of plants (control and stressed plants). Note that feature labels are shared in the upper  
50  
51 534 and lower panels. Features are shown in numbers as ordered by their names. The three features highlighted  
52  
53 535 in the red dash box are digital volume, projected side area and projected top area. (E) Comparison of the  
54  
55 536 relative importance of features in prediction of FW and DW. The top six most different features are  
56  
57 537 highlighted and labeled.

58  
59 538  
60  
61  
62  
63  
64  
65

1  
2  
3  
4 539 **Figure 5.** Comparison of prediction accuracy across different experiments.  
5  
6 540 (A) Biomass prediction across experiments. Models were trained using data from one experiment and were  
7  
8 541 applied to another experiment for prediction. The whole set of plants (i.e., “control + stressed” plant) were  
9  
10 542 used in the analysis. Brown triangles denote stressed plants and green circles control plants. Red box indicates  
11  
12 543 that the prediction accuracy is relatively high between experiments 1 (Exp. 1) and 2. (B) Boxplots of  
13  
14 544 coefficient determination ( $R^2$ , left), Pearson's correlation coefficients ( $r$ , middle) and the root mean squared  
15  
16 545 relative error (RMSRE, right) for different comparisons. “Within” denotes a model trained and tested on data  
17  
18 546 from the same dataset with specific treatments (control, stress or both), and “Cross” represents a model  
19  
20 547 trained on one dataset and tested on another dataset. “Control → stress” denotes a model trained on data with  
21  
22 548 control treatment and tested on data with stress treatment, and vice versa for “stress → control”. The number  
23  
24 549 of possible analyses for each category was shown above the boxes.  
25  
26  
27 550

28  
29 551 **Figure 6.** Comparison of prediction accuracy across different treatments. Refer to **Figure 5A** for legend. The  
30  
31 552 analysis was performed for control and stressed plants separately.  
32  
33 553

## 34 35 36 554 **Supplemental Data**

37  
38  
39 555 The following supplemental materials are available.

40  
41 556 **Supplemental Figure S1.** The relative importance of image-based features in prediction of biomass in  
42  
43 557 control plants. Refer to **Figure 4** for legend. The calculation was based on control plants.

44  
45 558 **Supplemental Figure S2.** The relative importance of image-based features in prediction of biomass in  
46  
47 559 stressed plants. Refer to **Figure 4** for legend. The calculation was based on stressed plants.  
48  
49 560

50  
51 561 **Supplemental Table S1.** Overview of three high-throughput phenotyping experiments in barley.  
52

| Experiment      | #plants/#genotypes <sup>1</sup> | Date of sowing | Date of harvesting | Biomass <sup>2</sup> |
|-----------------|---------------------------------|----------------|--------------------|----------------------|
| Exp. 1 (1121KN) | 310/18                          | 27.05.2011     | 24.07.2011         | FW & DW              |
| Exp. 2 (1130KN) | 310/18                          | 22.07.2011     | 18.09.2011         | FW                   |

|                 |        |            |            |         |
|-----------------|--------|------------|------------|---------|
| Exp. 3 (1137KN) | 309/18 | 16.09.2011 | 13.11.2011 | FW & DW |
|-----------------|--------|------------|------------|---------|

562 <sup>1</sup>Number of plants or genotypes used in analysis (filtered data).

563 <sup>2</sup>Types of biomass measurement. FW: fresh weight; DW: dry weight.

564

565 **Supplemental Data S1.** Manual data and image-derived data in the three experiments.

566

## 567 **References**

- 568 1. Catchpole WR and Wheeler CJ: **Estimating plant biomass: a review of techniques.** *Australian Journal*  
569 *of Ecology* 1992, **17**: 121–131.
- 570 2. Tackenberg O: **A new method for non-destructive measurement of biomass, growth rates, vertical**  
571 **biomass distribution and dry matter content based on digital image analysis.** *Annals of botany* 2007,  
572 **99(4):777-783.**
- 573 3. Golzarian MR, Frick RA, Rajendran K, Berger B, Roy S, Tester M, Lun DS: **Accurate inference of**  
574 **shoot biomass from high-throughput images of cereal plants.** *Plant Methods* 2011, **7**:2.
- 575 4. Fahlgren N, Gehan MA and Baxter I: **Lights, camera, action: high-throughput plant phenotyping is**  
576 **ready for a close-up.** *Current Opinion in Plant Biology* 2015, **24**:93–99.
- 577 5. Montes JM, Technow F, Dhillon BS, Mauch F, Melchinger AE: **High-throughput non-destructive**  
578 **biomass determination during early plant development in maize under field conditions.** *Field Crops*  
579 *Research* **121(2)**: 268-273.
- 580 6. Feng H, Jiang N, Huang C, Fang W, Yang W, Chen G, Xiong L, Liu Q: **A hyperspectral imaging system**  
581 **for an accurate prediction of the above-ground biomass of individual rice plants.** *Review of*  
582 *Scientific Instruments* 2013, **84(9)**:095107-095107.
- 583 7. Neumann K, Zhao Y, Chu J, Keilwagen J, Reif JC, Kilian B, Graner A: **Genetic architecture and**  
584 **temporal patterns of biomass accumulation in spring barley revealed by image analysis.** *BMC plant*  
585 *biology* 2017, **17(1)**:137.
- 586 8. Zhang X, Huang C, Wu D, Qiao F, Li W, Duan L, Wang K, Xiao Y, Chen G, Liu Q et al: **High-**  
587 **Throughput Phenotyping and QTL Mapping Reveals the Genetic Architecture of Maize Plant**



1  
2  
3  
4  
5  
6  
7  
8  
9  
10  
11  
12  
13  
14  
15  
16  
17  
18  
19  
20  
21  
22  
23  
24  
25  
26  
27  
28  
29  
30  
31  
32  
33  
34  
35  
36  
37  
38  
39  
40  
41  
42  
43  
44  
45  
46  
47  
48  
49  
50  
51  
52  
53  
54  
55  
56  
57  
58  
59  
60  
61  
62  
63  
64  
65

588           **Growth.** *Plant Physiology* 2017, **173** (3): 1554-1564.

589   9. Muraya MM, Chu J, Zhao Y, Junker A, Klukas C, Reif JC, Altmann T: **Genetic variation of growth**  
590           **dynamics in maize (*Zea mays* L.) revealed through automated non-invasive phenotyping.** *The*  
591           *Plant Journal* 2017, **89**(2):366-380.

592   10. Fahlgren N., Feldman M., Gehan M.A., Wilson M.S., Shyu C., Bryant D.W., Hill S.T., McEntee C.J.,  
593           Warnasooriya S.N., Kumar I, Ficor T., Turnipseed S., Gilbert K.B., Brutnell T.P., Carrington J.C.,  
594           Mockler T.C., and Baxter I: **A Versatile Phenotyping System and Analytics Platform Reveals Diverse**  
595           **Temporal Responses to Water Availability in *Setaria*.** *Molecular Plant* 2015, **8**: 1520–1535.

596   11. Yang WN, Zilong Guo ZL, Huang CL, Duan LF, Chen GX, Jiang N, Fang W, Feng H, Xie WB, Lian  
597           XM et al: **Combining high-throughput phenotyping and genome-wide association studies to reveal**  
598           **natural genetic variation in rice.** *Nature Communications* 2014, **5**:5087.

599   12. Ehlert D, Horn H-J, Adamek R: **Measuring crop biomass density by laser triangulation.** *Computers*  
600           *and electronics in agriculture* 2008, **61**(2):117-125.

601   13. Ehlert D, Heisig M, Adamek R: **Suitability of a laser rangefinder to characterize winter wheat.**  
602           *Precision Agric* 2010, **11**(6):650-663.

603   14. Erdle K, Mistele B, Schmidhalter U: **Comparison of active and passive spectral sensors in**  
604           **discriminating biomass parameters and nitrogen status in wheat cultivars.** *Field Crops Research*  
605           2011, **124**(1):74-84.

606   15. Busemeyer L, Ruckelshausen A, Moller K, Melchinger AE, Alheit KV, Maurer HP, Hahn V, Weissmann  
607           EA, Reif JC, Wurschum T: **Precision phenotyping of biomass accumulation in triticale reveals**  
608           **temporal genetic patterns of regulation.** *Scientific reports* 2013, **3**:2442-2442.

609   16. Cao Q, Miao Y, Wang H, Huang S, Cheng S, Khosla R, Jiang R: **Non-destructive estimation of rice**  
610           **plant nitrogen status with Crop Circle multispectral active canopy sensor.** *Field Crops Research*  
611           2013, **154**:133-144.

612   17. Fernandez MGS, Bao Y, Tang L, Schnable PS: High-throughput phenotyping for biomass crops. *Plant*  
613           *Physiology* 2017, DOI: 10.1104/pp.17.00707.

614   18. Neilson EH, Edwards AM, Blomstedt CK, Berger B, Møller BL, Gleadow RM: **Utilization of a high-**  
615           **throughput shoot imaging system to examine the dynamic phenotypic responses of a C4 cereal**

1  
2  
3  
4  
5  
6  
7  
8  
9  
10  
11  
12  
13  
14  
15  
16  
17  
18  
19  
20  
21  
22  
23  
24  
25  
26  
27  
28  
29  
30  
31  
32  
33  
34  
35  
36  
37  
38  
39  
40  
41  
42  
43  
44  
45  
46  
47  
48  
49  
50  
51  
52  
53  
54  
55  
56  
57  
58  
59  
60  
61  
62  
63  
64  
65

616 **crop plant to nitrogen and water deficiency over time.** *Journal of experimental botany* 2015.

617 19. Klukas C, Chen D, Pape JM: **Integrated Analysis Platform: An Open-Source Information System**

618 **for High-Throughput Plant Phenotyping.** *Plant Physiol* 2014, **165**(2):506-518.

619 20. Chen D, Neumann K, Friedel S, Kilian B, Chen M, Altmann T, Klukas C: **Dissecting the phenotypic**

620 **components of crop plant growth and drought responses based on high-throughput image analysis.**

621 *Plant Cell* 2014, **26**:4636-4655.

622 21. Cheng C, Alexander R, Min R, Leng J, Yip KY, Rozowsky J, Yan K-K, Dong X, Djebali S, Ruan Y *et*

623 *al*: **Understanding transcriptional regulation by integrative analysis of transcription factor binding**

624 **data.** *Genome research* 2012, **22**(9):1658-1667.

625 22. Cheng C, Gerstein M: **Modeling the relative relationship of transcription factor binding and histone**

626 **modifications to gene expression levels in mouse embryonic stem cells.** *Nucleic Acids Research* 2012,

627 **40**(2):553-568.

628 23. Cheng C, Yan K-K, Yip KY, Rozowsky J, Alexander R, Shou C, Gerstein M, others: **A statistical**

629 **framework for modeling gene expression using chromatin features and application to**

630 **modENCODE datasets.** *Genome Biol* 2011, **12**(2):R15-R15.

631 24. Dong X, Greven MC, Kundaje A, Djebali S, Brown JB, Cheng C, Gingeras TR, Gerstein M, Guigó R,

632 Birney E *et al*: **Modeling gene expression using chromatin features in various cellular contexts.**

633 *Genome Biol* 2012, **13**(9):R53-R53.

634 25. Karlič R, Chung H-R, Lasserre J, Vlahoviček K, Vingron M: **Histone modification levels are predictive**

635 **for gene expression.** *Proceedings of the National Academy of Sciences* 2010, **107**(7):2926-2931.

636 26. Ma B, Wilker EH, Willis-Owen SAG, Byun H-M, Wong KCC, Motta V, Baccarelli AA, Schwartz J,

637 Cookson WOCM, Khabbaz K *et al*: **Predicting DNA methylation level across human tissues.** *Nucleic*

638 *acids research* 2014, **42**(6):3515-3528.

639 27. Zhang W, Spector T, Deloukas P, Bell J, Engelhardt B: **Predicting genome-wide DNA methylation**

640 **using methylation marks, genomic position, and DNA regulatory elements.** *Genome Biology* 2015,

641 **16**(1):14-14.

642 28. Das R, Dimitrova N, Xuan Z, Rollins RA, Haghighi F, Edwards JR, Ju J, Bestor TH, Zhang MQ:

643 **Computational prediction of methylation status in human genomic sequences.** *Proceedings of the*

1  
2  
3  
4  
5  
6  
7  
8  
9  
10  
11  
12  
13  
14  
15  
16  
17  
18  
19  
20  
21  
22  
23  
24  
25  
26  
27  
28  
29  
30  
31  
32  
33  
34  
35  
36  
37  
38  
39  
40  
41  
42  
43  
44  
45  
46  
47  
48  
49  
50  
51  
52  
53  
54  
55  
56  
57  
58  
59  
60  
61  
62  
63  
64  
65

644 *National Academy of Sciences* 2006, **103**(28):10713-10716.

645 29. Zheng H, Wu H, Li J, Jiang S-W: **CpGIMethPred: computational model for predicting methylation**  
646 **status of CpG islands in human genome.** *BMC medical genomics* 2013, **6**(Suppl 1):S13-S13.

647 30. Neumann K, Klukas C, Friedel S, Rischbeck P, Chen D, Entzian A, Stein N, Graner A, Kilian B:  
648 **Dissecting spatiotemporal biomass accumulation in barley under different water regimes using**  
649 **high-throughput image analysis.** *Plant, cell & environment* 2015.

650 31. Breiman L: **Random forests.** *Machine learning* 2001, **45**(1):5-32.

651 32. Dietz H, Steinlein T: **Determination of plant species cover by means of image analysis.** *Journal of*  
652 *Vegetation Science* 1996, **7**(1):131-136.

653 33. Leister D, Varotto C, Pesaresi P, Niwergall A, Salamini F: **Large-scale evaluation of plant growth in**  
654 **Arabidopsis thaliana by non-invasive image analysis.** *Plant Physiology and Biochemistry* 1999,  
655 **37**(9):671-678.

656 34. Paruelo JM, Lauenroth WK, Roset PA: **Estimating aboveground plant biomass using a photographic**  
657 **technique.** *Journal of Range Management* 2000:190-193.

658 35. Walter A, Scharf H, Gilmer F, Zierer R, Nagel KA, Ernst M, Wiese A, Virnich O, Christ MM, Uhlig B  
659 *et al*: **Dynamics of seedling growth acclimation towards altered light conditions can be quantified**  
660 **via GROWSCREEN: a setup and procedure designed for rapid optical phenotyping of different**  
661 **plant species.** *New Phytol* 2007, **174**(2):447-455.

662 36. Arvidsson S, Perez-Rodriguez P, Mueller-Roeber B: **A growth phenotyping pipeline for Arabidopsis**  
663 **thaliana integrating image analysis and rosette area modeling for robust quantification of genotype**  
664 **effects.** *New Phytol* 2011, **191**(3):895-907.

665 37. Hairmansis A, Berger B, Tester M, Roy SJ: **Image-based phenotyping for non-destructive screening**  
666 **of different salinity tolerance traits in rice.** *Rice* 2014, **7**(1):16-16.

667 38. Johnson JW: **A Heuristic Method for Estimating the Relative Weight of Predictor Variables in**  
668 **Multiple Regression.** *Multivariate Behavioral Research* 2000, **35**(1):1-19.

669 39. Chang C-C, Lin C-J: **LIBSVM: a library for support vector machines.** *ACM Transactions on*  
670 *Intelligent Systems and Technology (TIST)* 2011, **2**(3):27.

671 40. Loo LH, Wu LF, Altschuler SJ: **Image-based multivariate profiling of drug responses from single**

1  
2  
3  
4  
5  
6  
7  
8  
9  
10  
11  
12  
13  
14  
15  
16  
17  
18  
19  
20  
21  
22  
23  
24  
25  
26  
27  
28  
29  
30  
31  
32  
33  
34  
35  
36  
37  
38  
39  
40  
41  
42  
43  
44  
45  
46  
47  
48  
49  
50  
51  
52  
53  
54  
55  
56  
57  
58  
59  
60  
61  
62  
63  
64  
65

672 **cells**. *Nature methods* 2007, **4**(5):445-453.

673 41. Iyer-Pascuzzi AS, Symonova O, Mileyko Y, Hao Y, Belcher H, Harer J, Weitz JS, Benfey PN: **Imaging**  
674 **and analysis platform for automatic phenotyping and trait ranking of plant root systems**. *Plant*  
675 *physiology* 2010, **152**(3):1148-1157.

676 42. Arend D, Junker A, Scholz U, Schuler D, Wylie J, Lange M: **PGP repository: a plant phenomics and**  
677 **genomics data publication infrastructure**. *Database : the journal of biological databases and curation*  
678 2016, **2016**.

679 43. Cwiek-Kupczynska H, Altmann T, Arend D, Arnaud E, Chen D, Cornut G, Fiorani F, Frohmberg W,  
680 Junker A, Klukas C *et al*: **Measures for interoperability of phenotypic data: minimum information**  
681 **requirements and formatting**. *Plant methods* 2016, **12**:44.

682

683

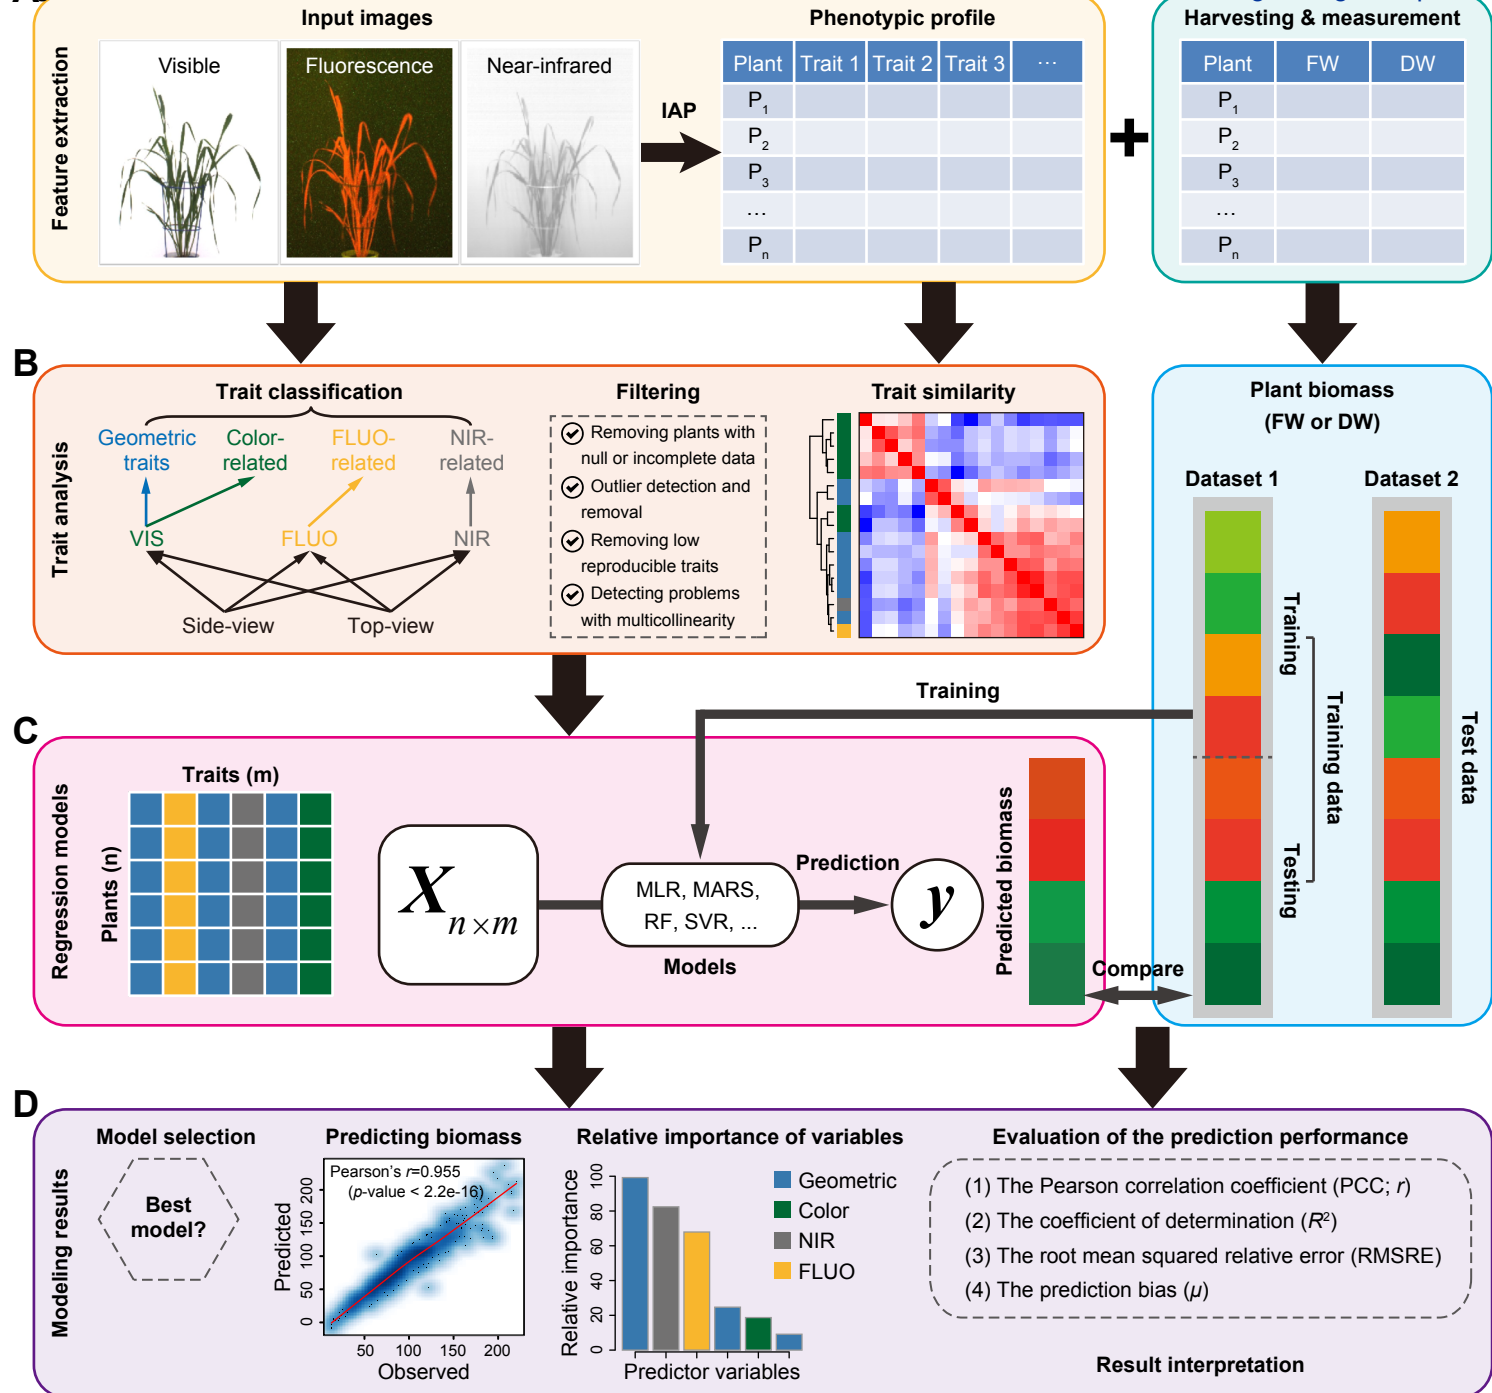

Figure 2

[Click here to download Figure Figure 2.pdf](#)
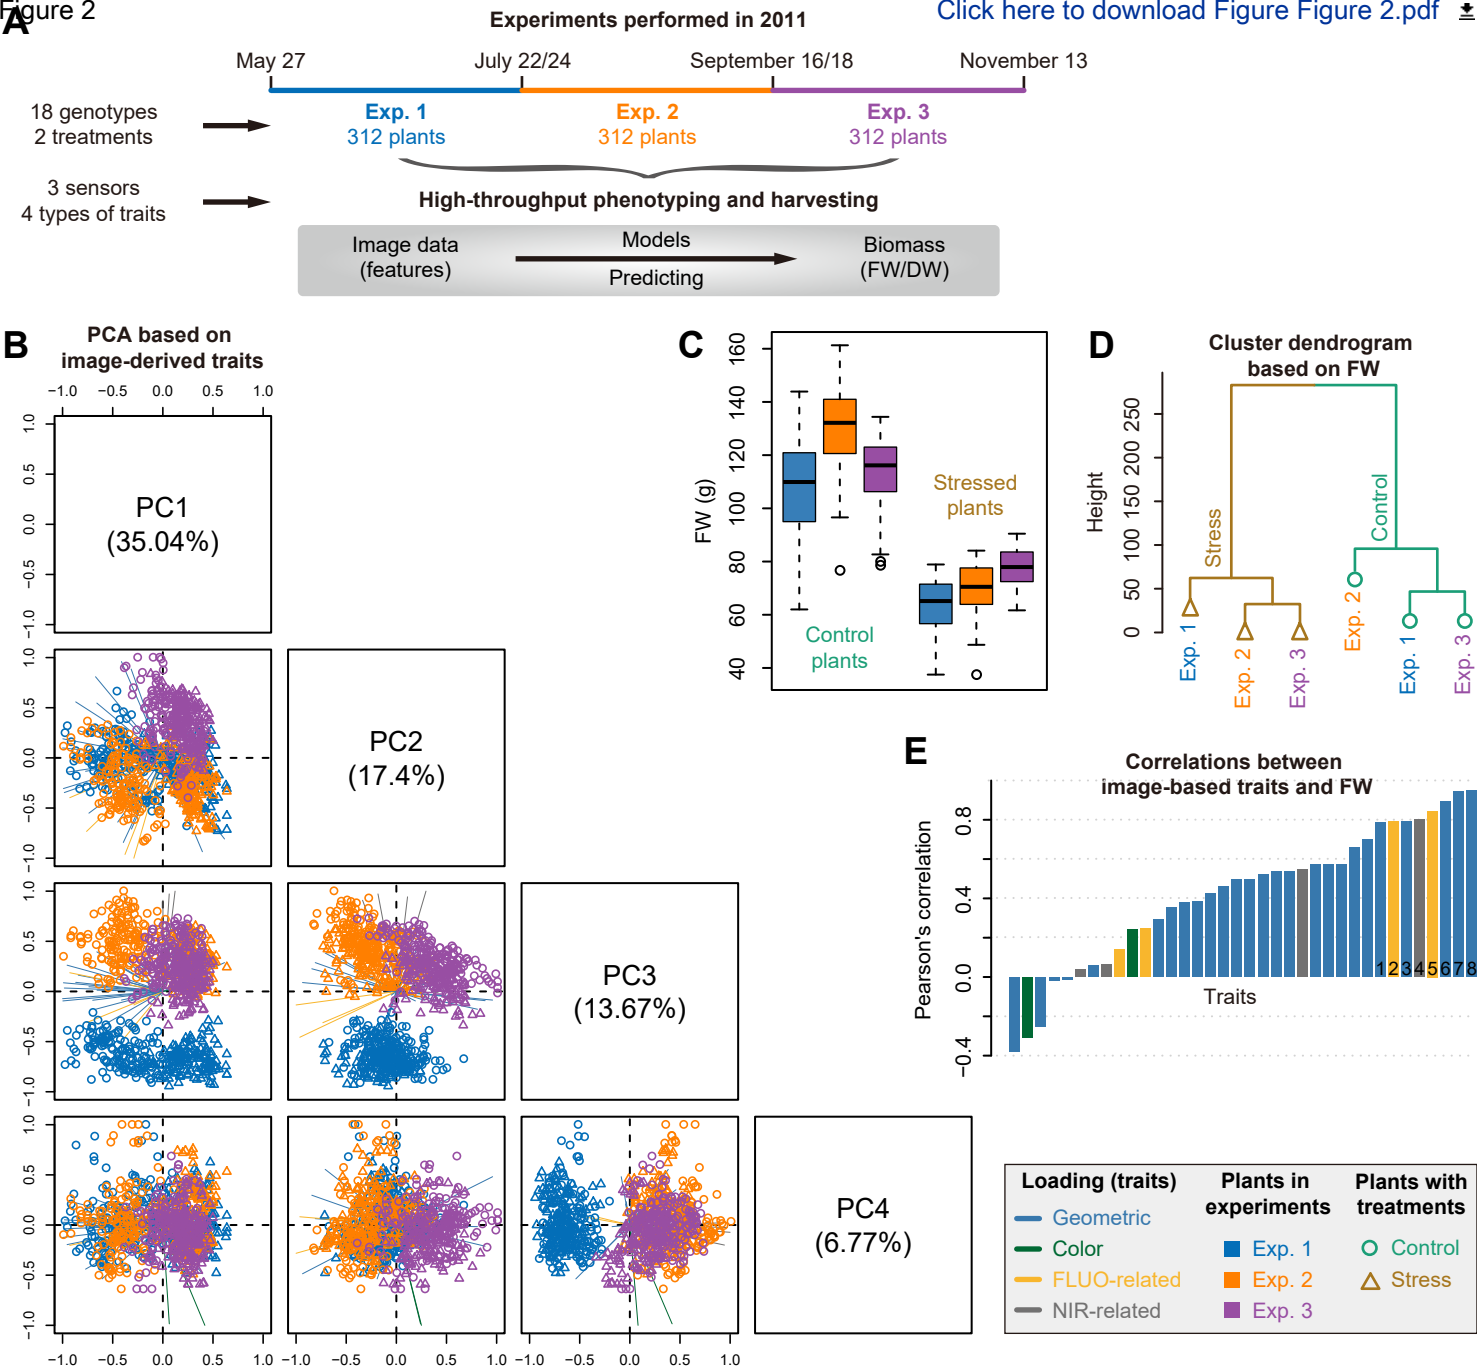

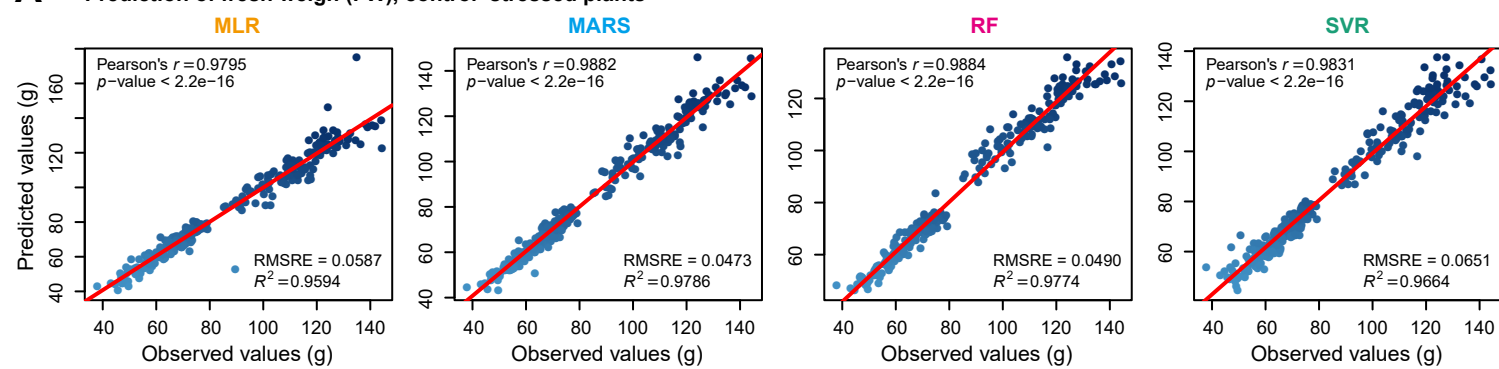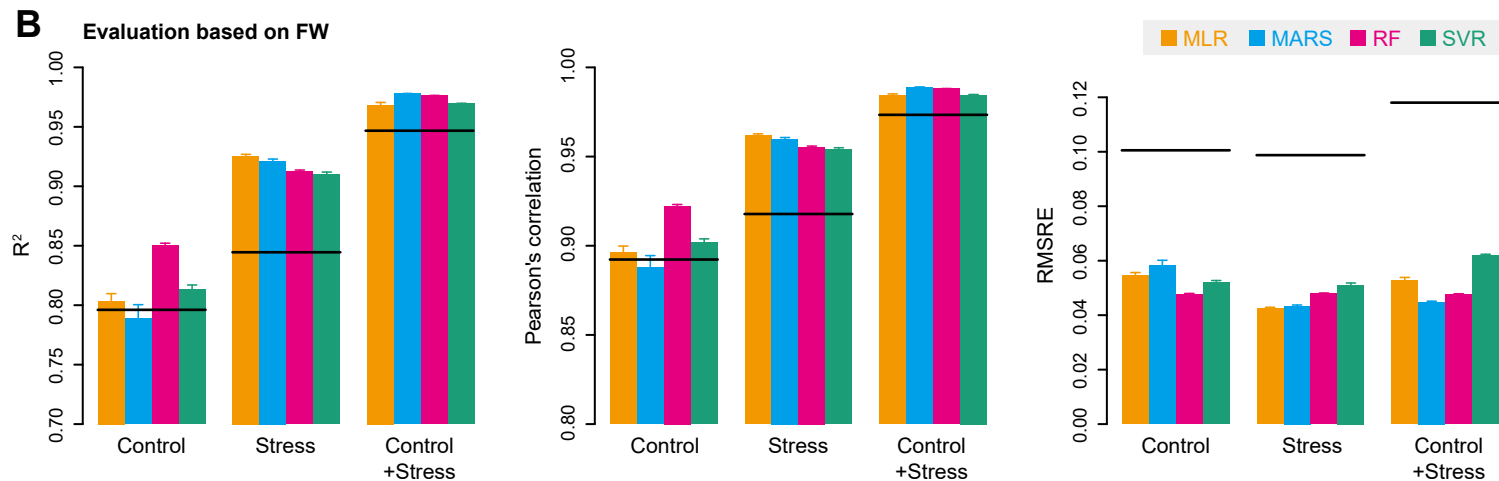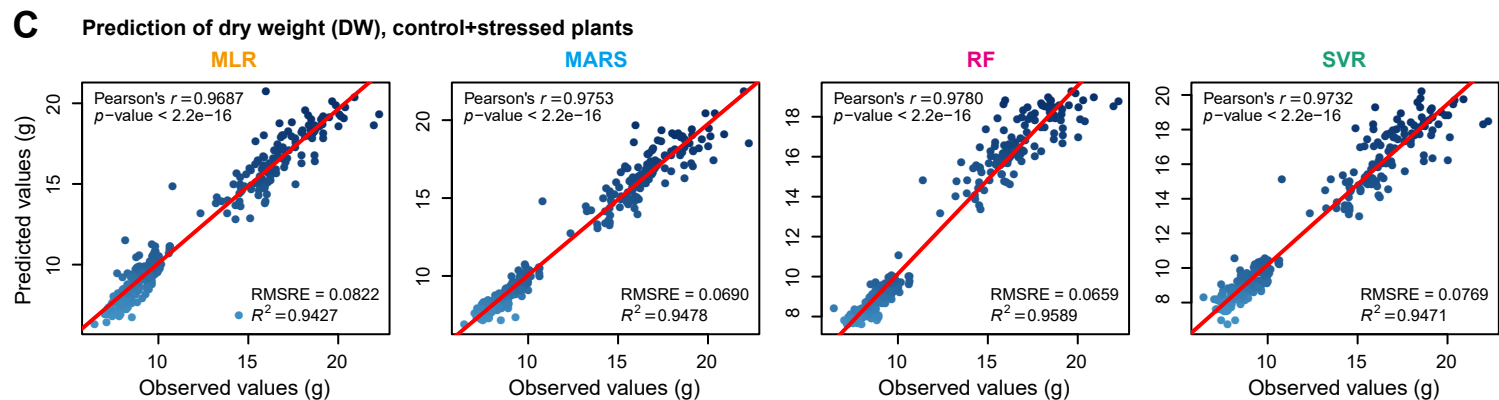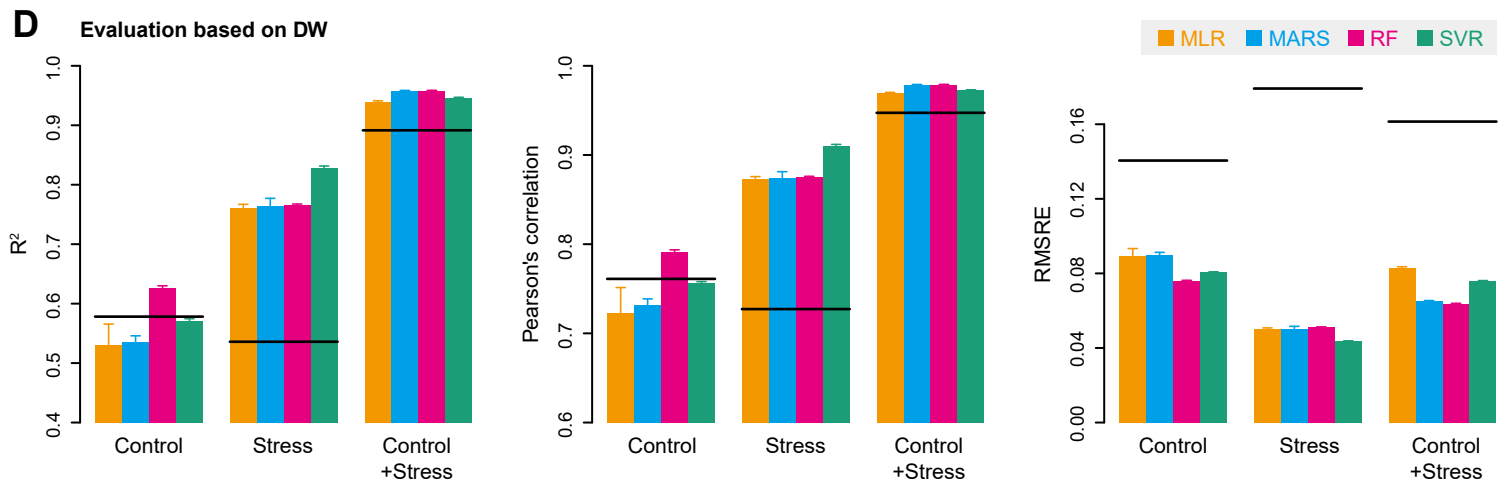

**Figure 4**

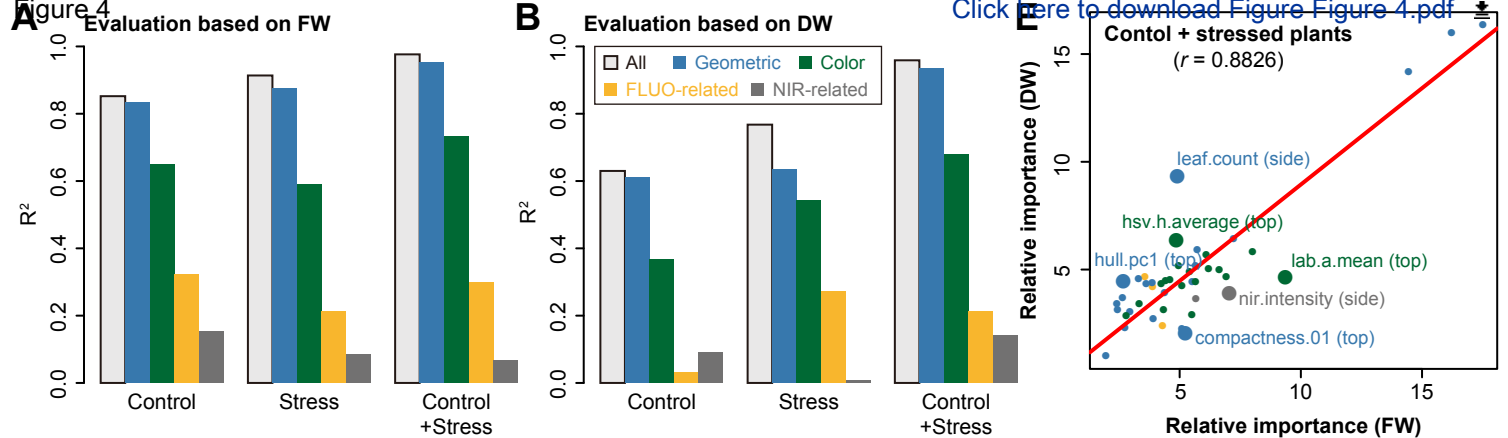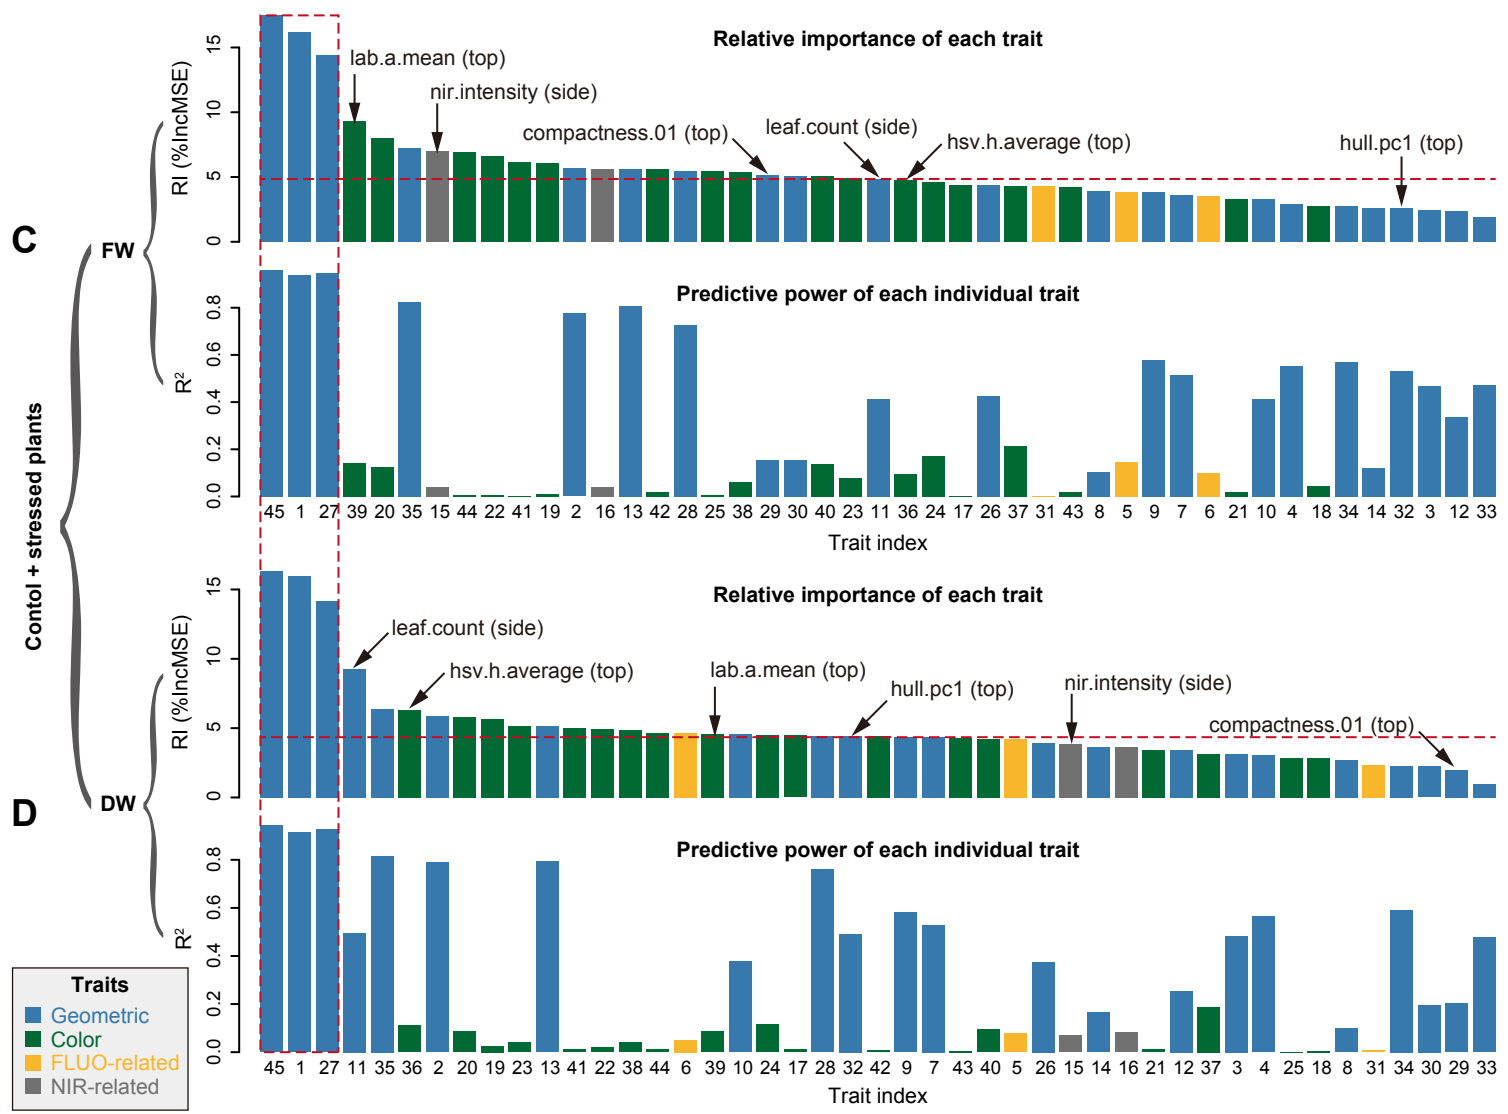



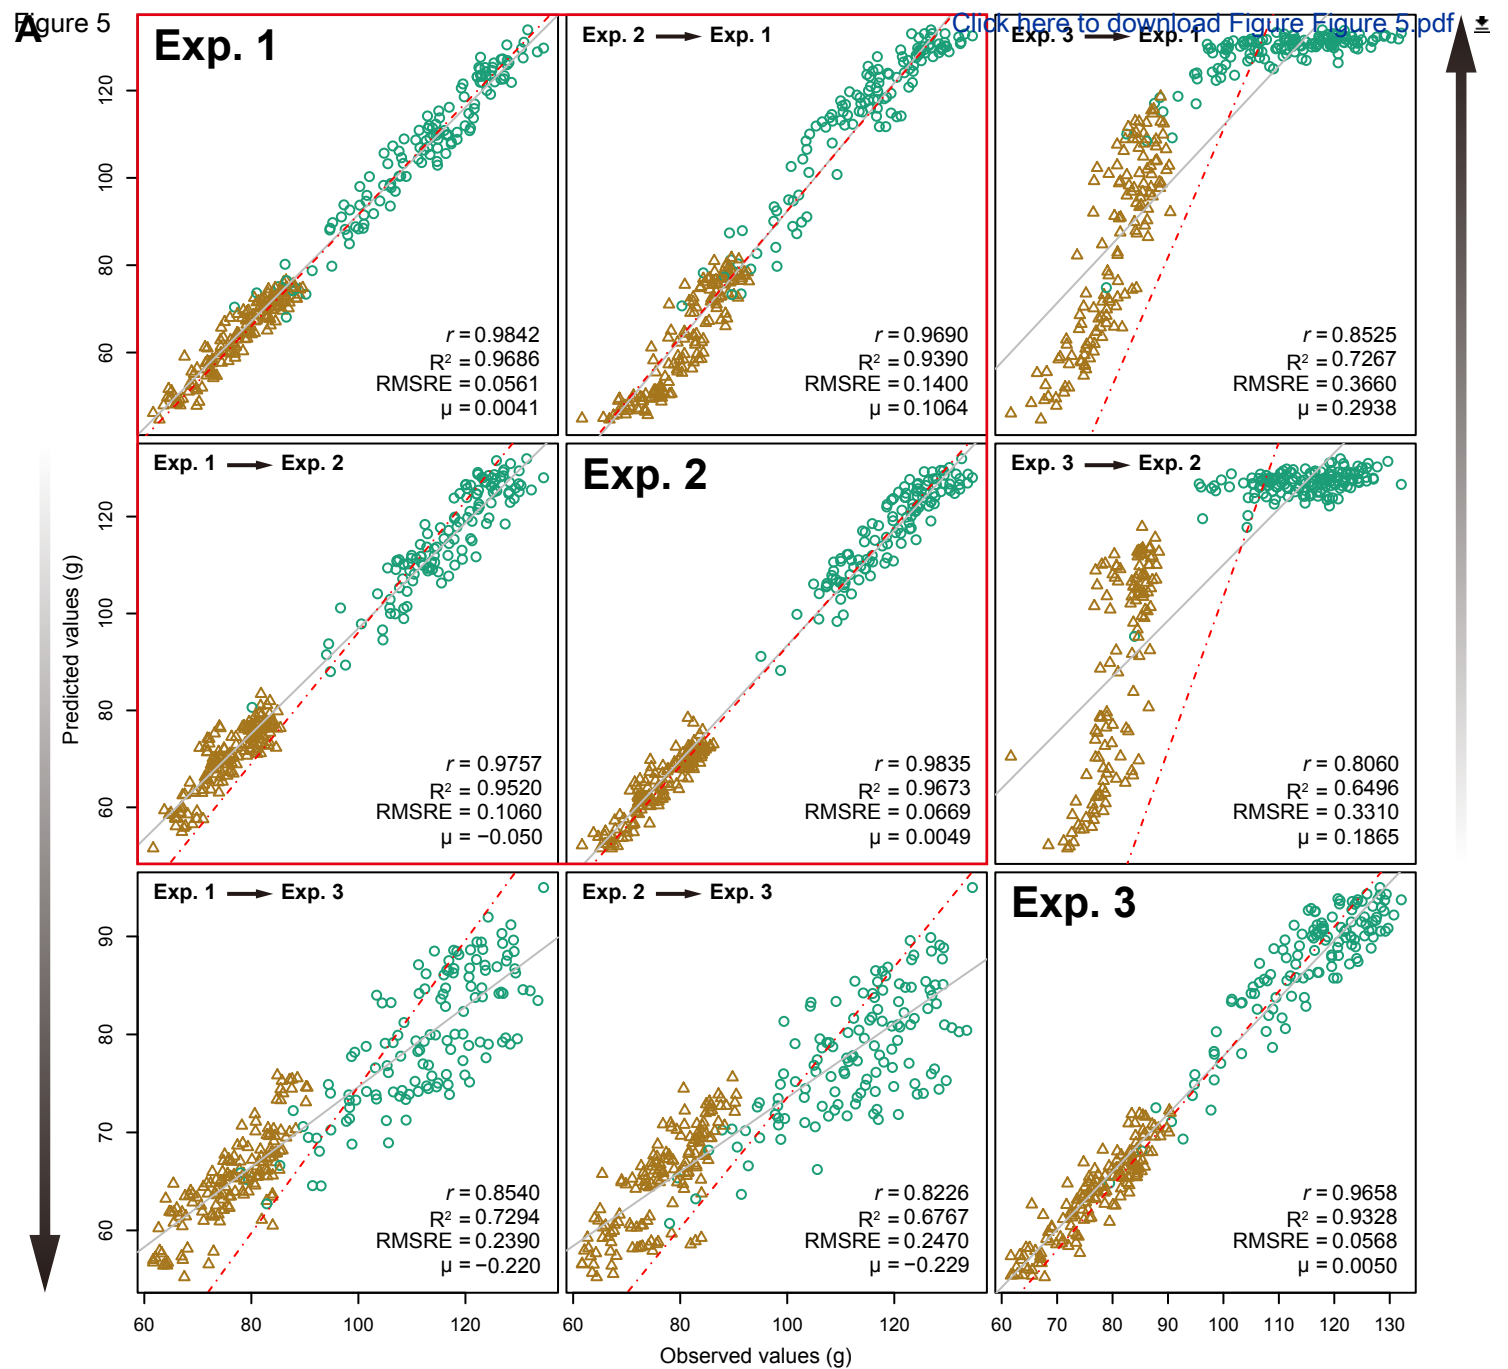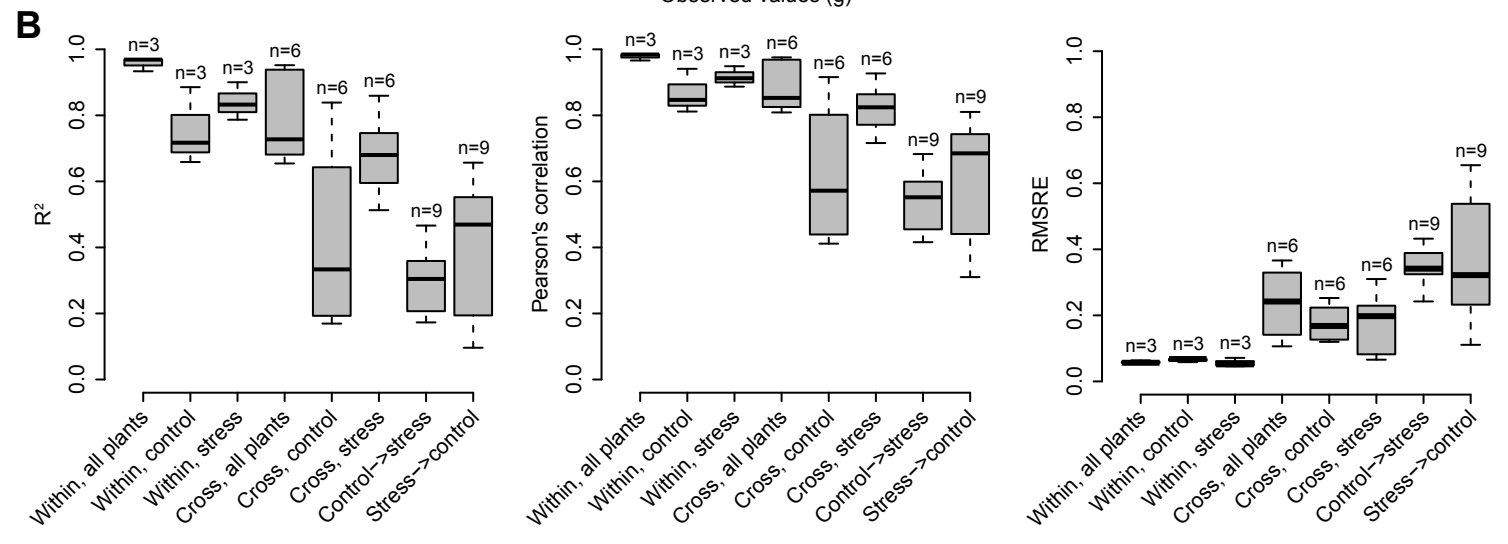

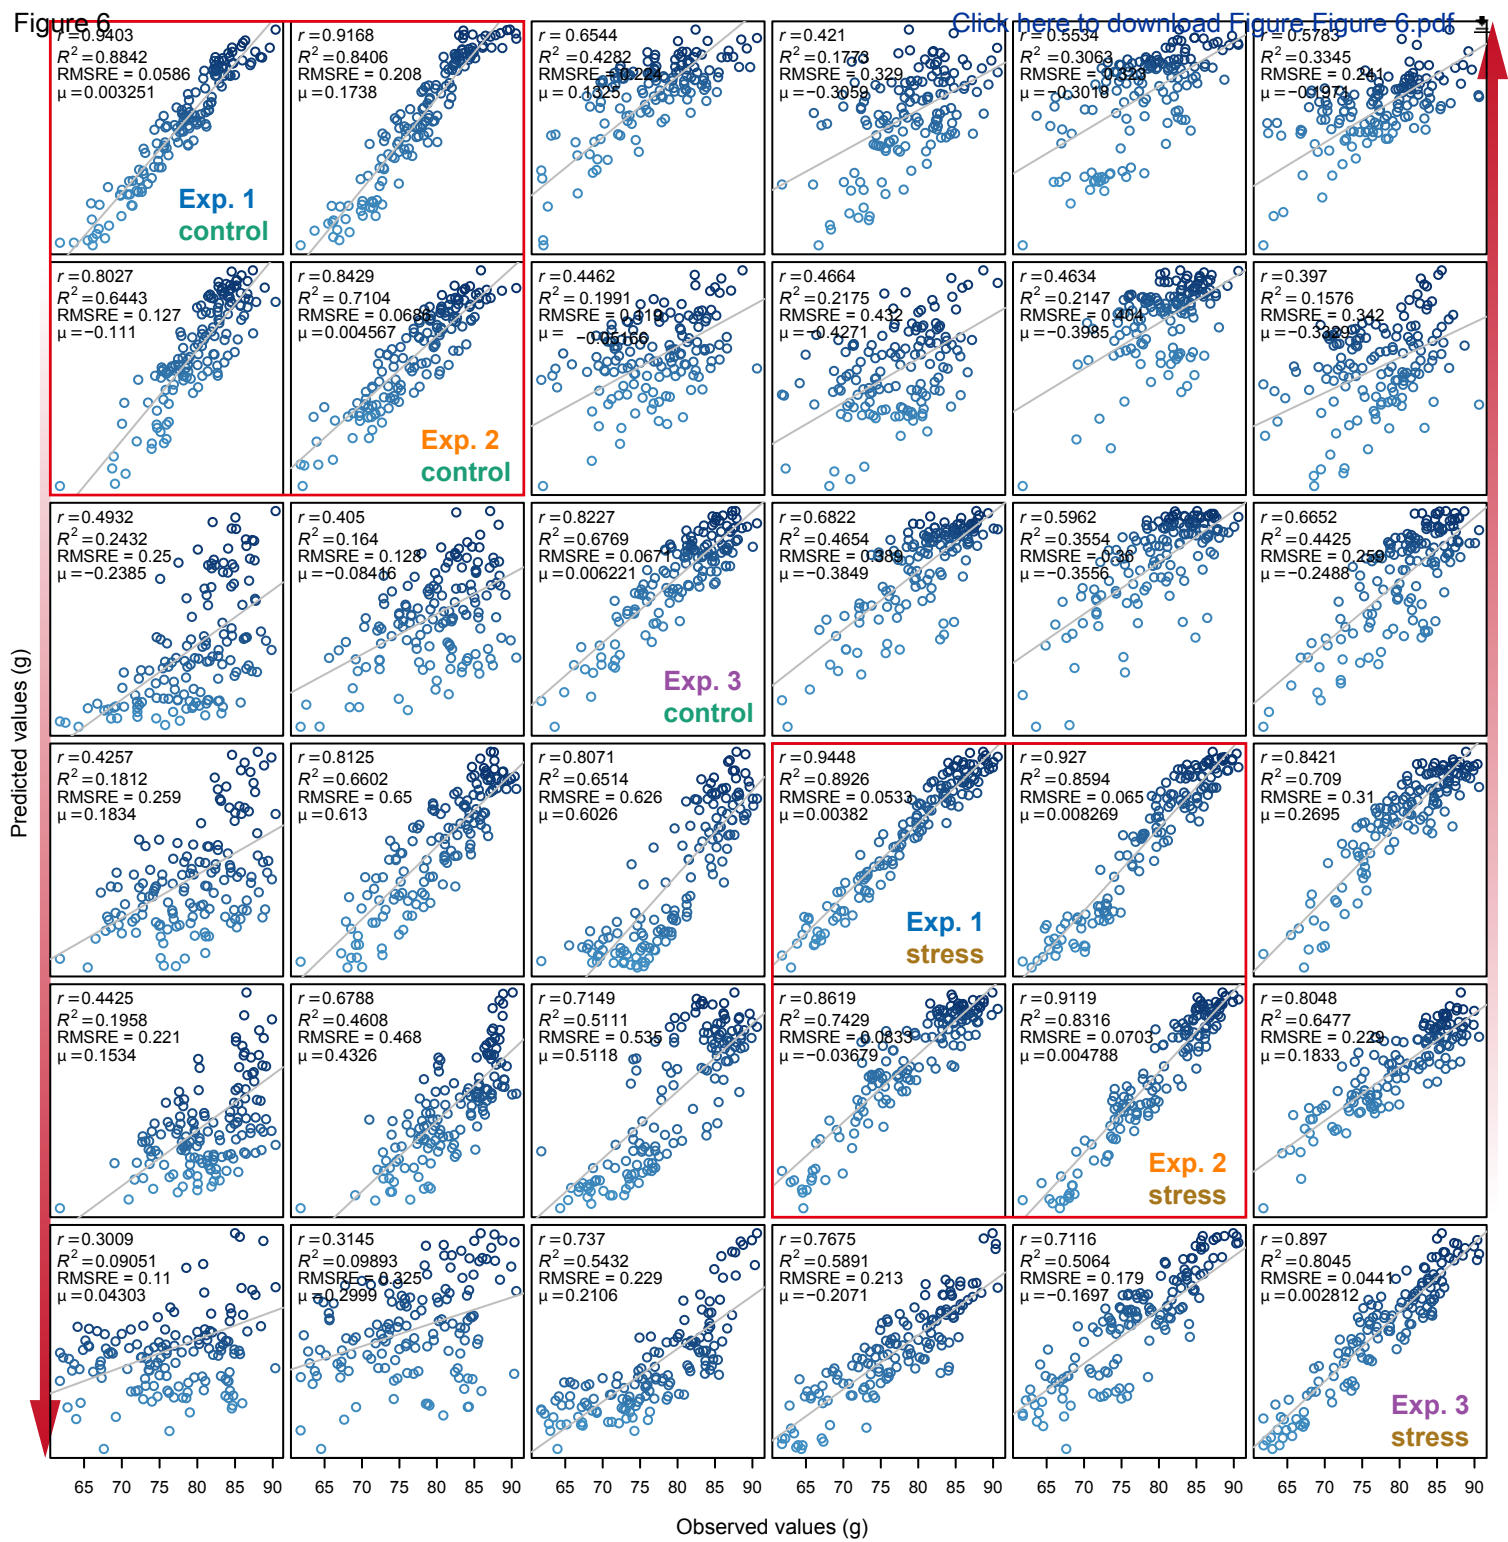



Click here to access/download  
**Supplementary Material**  
Supplemental Figures.pdf



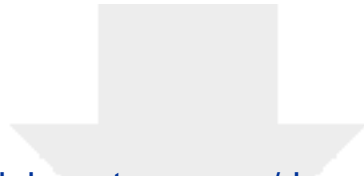

Click here to access/download  
**Supplementary Material**  
Supplemental Data S1.xlsx

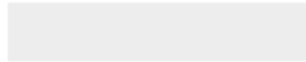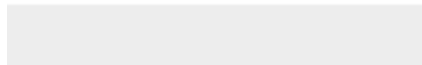

Supplement: giy001_giga-d-17-00225_revision_1.pdf [file giy001_giga-d-17-00225_revision_1.pdf]
