# Supplementary material for: Predicting plant biomass accumulation from image-derived parameters
Source: PubMed Central journal article supplement (PMC5827348; doi:10.1093/gigascience/giy001), 2018-01-16
Supplement: giy001_reviewer_2_report_(revision_1).pdf [file giy001_reviewer_2_report_%28revision_1%29.pdf]

## **Reviewer Report**

**Title:** Predicting plant biomass accumulation from image-derived parameters

**Version:** Revision 1      **Date:** 04 Dec 2017

**Reviewer name:** Christian Fournier

### **Reviewer Comments to Author:**

I thank the authors for the work done on the new manuscript and on Github, that address most of the concerns I raised in my first review.

The pipeline published on GitHub now works nicely and allows to reproduce the different analyses. I only had to install manually two packages (earth and e1071). They could be easily added to the list of dependency in the R script to completely automatize the installation.

The authors also clarify their analysis of the comparison of models, and the overstatement concerning the RF model has been corrected.

I however still think that the abstract should be amended to better match the conclusions of the cross experiment test. The author acknowledged, in their response and in the text (line 226) that one cross experiment test leads to a loss of predictive accuracy.

It seems also obvious, from Figure 5, and this should probably be added to the text, that this loss of accuracy is not linked to a greater random dispersion of the points, but to a systematic model bias. I agree with the authors that this may be due to some changes in the experimental conditions. My point is that these changes are not completely captured by the model, even with the inclusion of non structural traits. I therefore still think that there is some overstatement/ambiguity in the abstract, in particular in the sentence 'The high prediction accuracy based on this model, in particular the cross experiment

performance, will contribute to relieve the phenotyping bottleneck in biomass measurement in breeding applications' .

This may however be easily fixed.

### **Methods**

Are the methods appropriate to the aims of the study, are they well described, and are necessary controls included? Yes

### **Conclusions**

Are the conclusions adequately supported by the data shown? No

### **Reporting Standards**

Does the manuscript adhere to the journal's guidelines on [minimum standards of reporting](#)? Yes

### **Statistics**

Are you able to assess all statistics in the manuscript, including the appropriateness of statistical tests used? Yes, and I have assessed the statistics in my report.

### **Quality of Written English**

Please indicate the quality of language in the manuscript: Acceptable

### **Declaration of Competing Interests**

Please complete a declaration of competing interests, considering the following questions:

- Have you in the past five years received reimbursements, fees, funding, or salary from an organisation that may in any way gain or lose financially from the publication of this manuscript, either now or in the future?
- Do you hold any stocks or shares in an organisation that may in any way gain or lose financially from the publication of this manuscript, either now or in the future?
- Do you hold or are you currently applying for any patents relating to the content of the manuscript?
- Have you received reimbursements, fees, funding, or salary from an organization that holds or has applied for patents relating to the content of the manuscript?
- Do you have any other financial competing interests?
- Do you have any non-financial competing interests in relation to this paper?

If you can answer no to all of the above, write 'I declare that I have no competing interests' below. If your reply is yes to any, please give details below.

I declare that I have no competing interests

I agree to the open peer review policy of the journal. I understand that my name will be included on my report to the authors and, if the manuscript is accepted for publication, my named report including any attachments I upload will be posted on the website along with the authors' responses. I agree for my report to be made available under an Open Access Creative Commons CC-BY license (<http://creativecommons.org/licenses/by/4.0/>). I understand that any comments which I do not wish to be included in my named report can be included as confidential comments to the editors, which will not be published.

I agree to the open peer review policy of the journal

To further support our reviewers, we have joined with Publons, where you can gain additional credit to further highlight your hard work (see: <https://publons.com/journal/530/gigascience>). On publication of this paper, your review will be automatically added to Publons, you can then choose whether or not to claim your Publons credit. I understand this statement.

Yes
